# Supplementary material for: Coordination chemistry of a low-coordinate non-metal element: the case of electrophilic terminal phosphinidene complexes
Source: Royal Society of Chemistry journal article supplement (doi:10.1039/c6dt02909d), 2016-01-01
Supplement: c6dt02909d1.pdf [file c6dt02909d1.pdf]

## Electronic Supplementary Information (ESI)

### Coordination chemistry of a low-coordinate non-metal element: the case of electrophilic terminal phosphinidene complexes

José Manuel Villalba Franco,<sup>[a]</sup> Gregor Schnakenburg,<sup>[a]</sup> Arturo Espinosa Ferao,<sup>\*[b]</sup>  
and Rainer Streubel<sup>†[a]</sup>

[a] Institut für Anorganische Chemie der Rheinischen Friedrich-Wilhelms-Universität Bonn, Gerhard-Domagk-Str. 1, 53121 Bonn, Germany. Fax: +49 228 739616; Tel: +49 228 735345; E-mail: [r.streubel@uni-bonn.de](mailto:r.streubel@uni-bonn.de)

[b] Departamento de Química Orgánica, Universidad de Murcia, Campus de Espinardo, 30100 – Murcia, Spain. Fax: +34 868 884149; Tel: +34 868 887489; E-mail: [artuesp@um.es](mailto:artuesp@um.es)

#### Table of contents

|                                                                                           |     |
|-------------------------------------------------------------------------------------------|-----|
| <b>Experimental methods</b>                                                               | S2  |
| Synthesis of <b>2</b>                                                                     | S2  |
| General procedure for the formation of complexes <b>4a,b</b>                              | S3  |
| Synthesis of <b>5</b>                                                                     | S3  |
| <b>X-ray crystallographic analysis</b>                                                    | S4  |
| Table SI 1. Crystal data and structure refinement for <b>2</b>                            | S5  |
| Table SI 2. Crystal data and structure refinement for <b>4a</b>                           | S5  |
| Table SI 3. Crystal data and structure refinement for <b>5</b>                            | S6  |
| <b>Computational details</b>                                                              | S8  |
| P-N bond cleavage in <i>E</i> -imino-azaphosphiridine                                     | S9  |
| Theoretical study of the thionation reaction of <b>1''</b>                                | S9  |
| Table SI 4: Comparative of energetics at different computational levels                   | S10 |
| <b>Calculated structures:</b> Cartesian coordinates and energies for all computed species | S11 |
| References                                                                                | S26 |

## Experimental methods

### Analytical methods

*Melting point measurements* were determined with a Büchi (530) capillary apparatus.

*Elemental analysis* were performed using an ElementarVarioEL analytical gas chromatograph.

*Mass spectrometry*: Electron ionization (70eV) mass spectra were recorded on a Kratos MS 50 or on a MAT 95XL Finnigan spectrometer.

*NMR spectra* were recorded on a Bruker AX 300 spectrometer ( $^1\text{H}$ : 300.1 MHz,  $^{13}\text{C}$ : 75.0 MHz and  $^{31}\text{P}$ : 121.5 MHz,) using  $\text{CDCl}_3$  as solvent; shifts are given relative to external tetramethylsilane ( $^1\text{H}$ ,  $^{13}\text{C}$ ,) and 85%  $\text{H}_3\text{PO}_4$  ( $^{31}\text{P}$ ).

*IR spectra* were recorded with a SMART iTR Nicolet 380 FT IR spectrometer.

*Single-crystal structure analysis*: Reflection data for the X-ray crystallographic analysis were recorded on a STOE IPDS-2T diffractometer (STOE&Cie GmbH, Darmstadt, Germany), using graphite monochromated Mo- $K_\alpha$  radiation ( $\lambda = 0.71073 \text{ \AA}$ ). The diffractometer was equipped with a low-temperature device (Cryostream 700er series, Oxford Cryosystems, 123K). Intensities were measured by fine-slicing  $\omega$ -scans at different  $\phi$ -angles and corrected for background, polarization and Lorentz effects. The structures were solved by Patterson methods or Direct Methods (SHELXS-97) and refined by full-matrix least squares on  $F^2$  (SHELXL-97). All non-hydrogens were refined anisotropically. Hydrogen atoms were included isotropically using the riding model on the bound atoms; in some (denoted) cases hydrogen atoms were located in the Fourier difference electron density. Absorption corrections were carried out analytically or semi-empirically from equivalents. Additionally, some calculation of bond lengths and angles were obtained using the Ortep32 program.

*Synthesis of 2*: A 180 mg (0.25 mmol) 5 mL  $\text{Et}_2\text{O}$  solution of 3-imino-azaphosphoridine complex **1**<sup>1</sup> was stirred under a CO (20 bar) atmosphere for 20 hours at room temperature. The solvent was removed in *vacuo* ( $\sim 10^{-2}$  mbar) and a yellow oil was obtained. The product was then crystallized from  $\text{Et}_2\text{O}$  at  $-20 \text{ }^\circ\text{C}$  and obtained as white solid; yield: 130 mg (0.175 mmol, 70%), m.p. = 162-163  $^\circ\text{C}$ ;  $^1\text{H}$  NMR ( $\text{C}_6\text{D}_6$ ):  $\delta = 0.63$  (d, 3H,  $\text{C}=\text{N}-\text{CH}-\text{CH}_3$ ,  $^3J_{\text{H,H}} = 6.0$  Hz), 1.11 (d, 3H,  $\text{C}=\text{N}-\text{CH}-\text{CH}_3$ ,  $^3J_{\text{H,H}} = 6.0$  Hz), 1.13 (d, 3H,  $\text{C}-\text{N}-\text{CH}-\text{CH}_3$ ,  $^3J_{\text{H,H}} = 7.0$  Hz), 1.29 (d, 3H,  $\text{C}-\text{N}-\text{CH}-\text{CH}_3$ ,  $^3J_{\text{H,H}} = 7.0$  Hz), 3.20 (sept, 1H,  $\text{C}=\text{N}-\text{CH}(\text{CH}_3)_2$ ,  $^3J_{\text{H,H}} = 6.0$  Hz), 4.00 (sept, 1H,  $\text{C}-\text{N}-\text{CH}(\text{CH}_3)_2$ ,  $^3J_{\text{H,H}} = 7.0$  Hz), 7.1-7.7 (m, 15H, 3 x  $\text{C}_6\text{H}_5$ );  $^{13}\text{C}$  NMR ( $\text{C}_6\text{D}_6$ ):  $\delta = 19.6$  (s,  $\text{N}-\text{CH}-\text{CH}_3$ ), 19.9 (s,  $\text{N}=\text{CH}-\text{CH}_3$ ), 23.0 (s,  $\text{C}=\text{N}-\text{CH}-\text{CH}_3$ ), 24.5 (s,  $\text{N}-\text{CH}-\text{CH}_3$ ), 47.5 (d,  $\text{C}-\text{N}-\text{CH}$ ,  $^1J_{\text{P,C}} = 4.2$  Hz), 57.7 (d,  $^1J_{\text{P,C}} = 9.4$  Hz,  $\text{C}=\text{N}-\text{CH}$ ), 64.8 (d,  $\text{CPh}_3$ ,  $^1J_{\text{P,C}} = 2.0$  Hz), 128.2 (d,  $J_{\text{P,C}} = 2.2$  Hz,  $\text{C}-\text{C}^{\text{Ph}}$ ), 128.4 (d,  $J_{\text{P,C}} = 2.0$  Hz,  $\text{C}-\text{C}^{\text{Ph}}$ ), 128.5 (d,  $J_{\text{P,C}} = 2.4$  Hz,  $\text{C}-\text{C}^{\text{Ph}}$ ), 128.6 (d,  $J_{\text{P,C}} = 2.4$  Hz,  $\text{C}-\text{C}^{\text{Ph}}$ ), 128.9 (s,  $\text{C}-\text{C}^{\text{Ph}}$ ), 129.2 (d,  $J_{\text{P,C}} = 0.5$  Hz,  $\text{C}-\text{C}^{\text{Ph}}$ ), 130.1 (d,  $J_{\text{P,C}} = 2.5$  Hz,  $\text{C}-\text{C}^{\text{Ph}}$ ), 130.5 (d,  $J_{\text{P,C}} = 8.7$  Hz,  $\text{C}-\text{C}^{\text{Ph}}$ ), 132.1 (d,  $J_{\text{P,C}} = 8.0$  Hz,  $\text{C}-\text{C}^{\text{Ph}}$ ), 140.1 (d,  $^2J_{\text{P,C}} = 5.3$  Hz,  $\text{C}-\text{C}^{\text{ipso-Ph}}$ ), 141.0 (d,  $^2J_{\text{P,C}} = 1.5$  Hz,  $\text{C}-\text{C}^{\text{ipso-Ph}}$ ), 141.5 (d,  $^2J_{\text{P,C}} = 8.5$  Hz,  $\text{C}-\text{C}^{\text{ipso-Ph}}$ ), 148.9 (d,  $\text{P}-\text{C}=\text{N}$ ,  $^{1+3}J_{\text{P,C}}$

= 13.2 Hz), 169.6 (d, P-C=O,  $^{1+3}J_{P,C} = 52.1$  Hz), 195.2 (dSat,  $^2J_{P,C} = 5.4$  Hz,  $^1J_{W,C} = 126.7$ , *cis*-CO), 197.7 (d,  $^2J_{P,C} = 29.1$  Hz, *trans*-CO);  $^{31}\text{P}$  NMR ( $\text{C}_6\text{D}_6$ ):  $\delta = 94.9$  (s,  $^1J_{W,P} = 226.5$  Hz); MS (EI,  $^{184}\text{W}$ ):  $m/z$  (%): 752.0,  $[\text{M}]^+$  (2); 243,  $[\text{CPh}_3]^+$  (100); IR (ATR):  $\tilde{\nu} = 2972$  (b,  $\nu\text{-CH}_2$ ), 2076 (s,  $\nu\text{-CO}$ ), 1997 (s,  $\nu\text{-CO}$ ), 1919 (s,  $\nu\text{-CO}$ ), 1767 (s,  $\nu\text{-C=O}$ ), 1661 (b,  $\nu\text{-C=N}$ )  $\text{cm}^{-1}$ ; Elemental analysis for  $\text{C}_{38}\text{H}_{30}\text{F}_5\text{N}_2\text{O}_6\text{PW}$  Calcd (%): C 51.08, H 3.88, N 3.72, found (%): C 50.77, H 4.34, N 3.46.

*General procedure for the formation of complexes 4a,b:* To a  $\text{Et}_2\text{O}$  solution of 3-iminoazaphosphiridine complex **1**, 1 eq. of isocyanide (**3a,b**) was added at room temperature. The reaction mixture was stirred for 15 hours. When the reaction was completed the solvent was removed in *vacuo* ( $\sim 10^{-2}$  mbar) and a yellow oil was obtained. The product was then crystallized from  $\text{Et}_2\text{O}$  at  $-40$  °C and obtained as yellow solid. **4a**: yield: 309 mg (0.45 mmol, 60%); m.p. = 116-117 °C;  $^1\text{H}$  NMR ( $\text{C}_6\text{D}_6$ ):  $\delta = 0.67$  (s, 9H, C- $\text{CH}_3$ ), 6.9-7.1 (m, 9H,  $\text{C}_6\text{H}_5$ ), 7.4-7.5 (m, 6H, C- $\text{C}_6\text{H}_5$ );  $^{13}\text{C}$  NMR ( $\text{C}_6\text{D}_6$ ):  $\delta = 28.7$  (s, C-N-CH- $\text{CH}_3$ ), 58.6 (d,  $\text{CPh}_3$ ,  $^1J_{P,C} = 25.0$  Hz), 60.9 (s, N-C( $\text{CH}_3$ ) $_3$ ), 126.8 (d,  $J_{P,C} = 1.8$  Hz, C- $\text{C}^{\text{Ph}}$ ), 128.1 (s, C- $\text{C}^{\text{Ph}}$ ), 130.4 (d,  $J_{P,C} = 8.2$ , Hz, C- $\text{C}^{\text{Ph}}$ ), 146.9 (d, N $\equiv$ C-P,  $^1J_{P,C} = 6.8$  Hz), 197.9 (dSat,  $^2J_{P,C} = 3.6$  Hz,  $^1J_{W,C} = 126.6$ , *cis*-CO), 201.0 (d,  $^2J_{P,C} = 16.7$  Hz, *trans*-CO);  $^{31}\text{P}$  NMR ( $\text{C}_6\text{D}_6$ ):  $\delta = -50.0$  ppm (s,  $^1J_{W,P} = 117.7$  Hz). MS (EI,  $^{184}\text{W}$ ):  $m/z$  (%): 681.0  $[\text{M}]^+$  (2.5); 598.0  $[\text{M}-^t\text{BuN}\equiv\text{C}]^+$  (2); 514.0  $[\text{M}-^t\text{BuNC} - 2\times\text{CO}]^+$  (4); 243  $[\text{CPh}_3]^+$  (100); IR (ATR):  $\tilde{\nu} = 2988$  (b,  $\nu\text{-CH}_2$ ), 2142 (b,  $\nu\text{-N}\equiv\text{C}$ ), 2060 (s,  $\nu\text{-CO}$ ), 1923 (s,  $\nu\text{-CO}$ ), 1889 (s,  $\nu\text{-CO}$ ), 1847 (s,  $\nu\text{-CO}$ ),  $\text{cm}^{-1}$ ; UV-vis ( $\text{CH}_2\text{Cl}_2$ ):  $\lambda_{\text{max}}$  (abs.,  $\epsilon / \text{Lmol}^{-1}\text{cm}^{-1}$ ) = 232.0 (1.51, 100733); 212.5 (0.82, 54666); Elemental analysis for  $\text{C}_{29}\text{H}_{24}\text{NO}_5\text{PW}$  Calcd (%): C 51.12, H 3.55, N 2.06, found (%): C 50.90, H 3.93, N 2.61. **4b**:  $^1\text{H}$  NMR ( $\text{CDCl}_3$ ):  $\delta = 0.80$  (t, 3H,  $^3J_{\text{H,H}} = 7.4$  Hz,  $\text{CH}_2\text{-CH}_3$ ), 1.18 (m, 2H,  $-\text{CH}_2\text{-CH}_3$ ), 1.40 (m, 2H,  $-\text{CH}_2\text{-CH}_2\text{-CH}_2$ ), 3.56 (dt, 2H,  $^3J_{\text{H,H}} = 6.7$  Hz,  $^4J_{\text{P,H}} = 4.4$  Hz, N- $\text{CH}_2\text{-CH}_2$ ), 7.1-7.3 (m, 15H,  $\text{C}_6\text{H}_5$ );  $^{13}\text{C}$  NMR ( $\text{CDCl}_3$ ):  $\delta = 13.3$  (s,  $\text{CH}_2\text{-CH}_3$ ), 19.8 (s,  $-\text{CH}_2\text{-CH}_3$ ), 30.8 (d,  $^4J_{P,C} = 2.1$  Hz  $\text{CH}_2\text{-CH}_2\text{-CH}_2$ ), 46.7 (s, N- $\text{CH}_2\text{-CH}_2$ ), 58.8 (d,  $\text{CPh}_3$ ,  $^1J_{P,C} = 24.7$  Hz), 126.9 (d,  $J_{P,C} = 1.8$  Hz, C- $\text{C}^{\text{Ph}}$ ), 128.2 (s, C- $\text{C}^{\text{Ph}}$ ), 130.4 (d,  $J_{P,C} = 8.2$ , Hz, C- $\text{C}^{\text{Ph}}$ ), 146.6 (d, N $\equiv$ C-P,  $^1J_{P,C} = 6.6$  Hz), 197.7 (dSat,  $^2J_{P,C} = 3.5$  Hz,  $^1J_{W,C} = 126.4$ , *cis*-CO), 201.3 (d,  $^2J_{P,C} = 17.2$  Hz, *trans*-CO);  $^{31}\text{P}$  NMR ( $\text{CDCl}_3$ ):  $\delta = -51.8$  ppm (s,  $^1J_{W,P} = 118.2$  Hz).

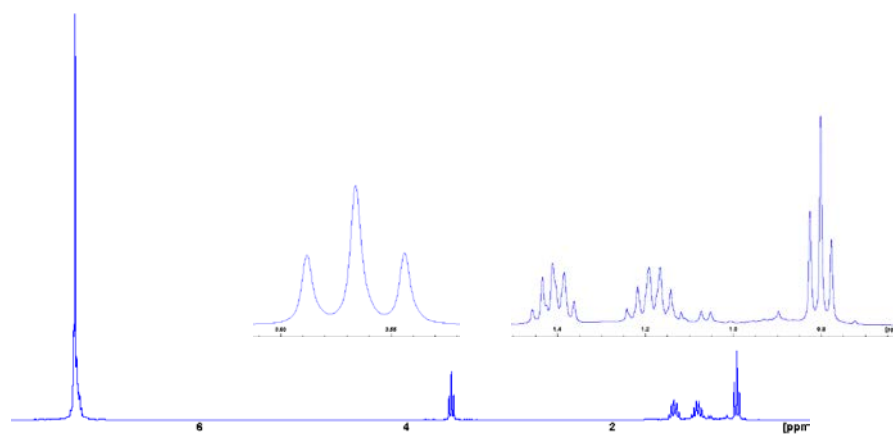

**Figure SI 1.**  $^1\text{H}\{^{31}\text{P}\}$  NMR ( $\text{CDCl}_3$ ) of **4b** with blow-up of significant regions.

Synthesis of **5**: To a 15 mL toluene solution of 350 mg (0.48 mmol) of 3-iminoazaphosphoridine complex **1**, 15.5 mg (1/8 eq.) of elemental sulfur ( $S_8$ ) was added at room temperature. The reaction mixture was stirred for 24 hours. When the reaction was completed the solvent was removed in *vacuo* ( $\sim 10^{-2}$  mbar) and a yellow oil was obtained. The product was then crystallized from  $Et_2O$  at  $-50$  °C and washed with pentane at  $-50$  °C. **5** was obtained as a white solid. Yield: 237 mg (0.31 mmol, 65%); m.p. = 142-143 °C;  $^1H$  NMR ( $CDCl_3$ ):  $\delta$  = 0.91 (d, 3H, P-N-CH- $CH_3$ ,  $^3J_{H,H}$  = 6.6 Hz), 1.01 (d, 3H, C-N-CH- $CH_3$ ,  $^3J_{H,H}$  = 6.2 Hz), 1.06 (d, 3H, C=N-CH- $CH_3$ ,  $^3J_{H,H}$  = 6.2 Hz), 1.49 (d, 3H, C=N-CH- $CH_3$ ,  $^3J_{H,H}$  = 6.6 Hz), 2.86 (dsept, 1H, C=N-CH( $CH_3$ ) $_2$ ,  $^3J_{H,H}$  = 6.2 Hz,  $^3J_{P,H}$  = 2.9 Hz), 2.98 (dsept, 1H, P-N-CH( $CH_3$ ) $_2$ ,  $^3J_{H,H}$  = 6.6 Hz,  $^3J_{P,H}$  = 11.7 Hz), 6.92-6.98 (m, 2H, C-Ph), 7.26-7.45 (m, 13H, C-Ph), 7.70-7.77 (m, 2H, C-Ph);  $^{13}C$  NMR ( $CDCl_3$ ):  $\delta$  = 19.7 (d, P-N-CH- $CH_3$ ,  $^2J_{P,C}$  = 1.5 Hz), 20.6 (d, P-N-C- $CH_3$ ,  $^2J_{P,C}$  = 2.0 Hz), 24.0 (s, C=N-C- $CH_3$ ), 24.3 (s, C=N-C- $CH_3$ ), 53.7 (d,  $^2J_{P,C}$  = 1.2 Hz, P-N-CH- $CH_3$ ), 54.0 (d, C=N-CH- $CH_3$ ,  $^2J_{P,C}$  = 1.1 Hz), 71.1 (d, P-CPh $_3$ ,  $^1J_{P,C}$  = 13.7 Hz), 127.9 (d,  $J_{C,P}$  = 2.0 Hz, C-Ph), 128.0 (d,  $J_{C,P}$  = 1.8 Hz, C-Ph), 128.3 (d,  $J_{C,P}$  = 3.0 Hz, C-Ph), 128.5 (d,  $J_{C,P}$  = 2.9 Hz, C-Ph), 128.8 (s, C-Ph), 129.0 (d,  $J_{C,P}$  = 1.2 Hz, C-Ph), 129.4 (s, C-Ph), 129.7 (d,  $J_{C,P}$  = 2.8 Hz, C-Ph), 131.3 (d,  $J_{C,P}$  = 3.5 Hz, C-Ph), 131.4 (d,  $J_{C,P}$  = 2.3 Hz, C-Ph), 139.1 (d,  $^{2+2}J_{C,P}$  = 6.8 Hz, C=N- $i$ Pr), 140.4 (d,  $^2J_{C,P}$  = 4.5 Hz,  $C^{ipso}$ -Ph), 141.2 (d,  $^2J_{C,P}$  = 4.9 Hz,  $C^{ipso}$ -Ph), 142.5 (d,  $^2J_{C,P}$  = 11.9 Hz,  $C^{ipso}$ -Ph), 196.5 (dSat,  $^2J_{P,C}$  = 6.7 Hz,  $^1J_{W,C}$  = 128.0, *cis*-CO), 198.6 (d,  $^2J_{P,C}$  = 37.1 Hz, *trans*-CO);  $^{31}P$  NMR ( $CDCl_3$ ): 122.6 (dSat,  $J_{P,H}$  = 10.7 Hz,  $^1J_{W,P}$  = 280.5 Hz); MS (EI,  $^{184}W$ ): m/z (%): calcd:  $[M+H]^+$  = 757.1120, found:  $[M+H]^+$  = 757.1123; IR (ATR):  $\tilde{\nu}$  = 2975 (b,  $\nu$ - $CH_2$ ), 2932 (b,  $\nu$ - $CH_2$ ), 2073 (s,  $\nu$ -CO), 1988 (s,  $\nu$ -CO), 1928 (s,  $\nu$ -CO), 1677 (s,  $\nu$ -CO), 1599 (b,  $\nu$ -C=N)  $cm^{-1}$ ; Elemental analysis for  $C_{31}H_{29}N_2O_5PSW$  Calcd (%): C 49.32, H 3.86, N 3.70, S 4.24 found (%): C 49.36, H 3.98, N 3.66, S 4.28.

## X-ray crystallographic analysis

Single crystals of **2**, **4a**, and **5** were obtained from recrystallization in 1/1 pentane/ $Et_2O$  mixtures at  $-40$  °C. Crystal data are summarized in Tables SI1, 2, 3. All hydrogen atoms were placed using AFIX instructions, while all other atoms were refined anisotropically. Supplementary crystallographic data were deposited at the Cambridge Crystallographic Data Centre (CCDC) under the numbers CCDC-1440416 (**2**), 1440417 (**4a**), 1440415 (**5**), and can be obtained free of charge via [www.ccdc.cam.ac.uk/data\\_request.cif](http://www.ccdc.cam.ac.uk/data_request.cif).

**Table SI 1.** Crystal data and structure refinement for **2**.

|                                             |                                                                  |
|---------------------------------------------|------------------------------------------------------------------|
| Identification code                         | GSTR414, JMV-460 // GXray4051g                                   |
| Device Type                                 | Bruker X8-KappaApexII                                            |
| Empirical formula                           | C <sub>32</sub> H <sub>29</sub> N <sub>2</sub> O <sub>6</sub> PW |
| Moiety formula                              | C32 H29 N2 O6 P W                                                |
| Formula weight                              | 752.38                                                           |
| Temperature/K                               | 100                                                              |
| Crystal system                              | Triclinic                                                        |
| Space group                                 | P $\bar{1}$                                                      |
| a/Å                                         | 9.5330(5)                                                        |
| b/Å                                         | 10.1180(5)                                                       |
| c/Å                                         | 17.1899(8)                                                       |
| $\alpha$ /°                                 | 96.245(3)                                                        |
| $\beta$ /°                                  | 104.796(3)                                                       |
| $\gamma$ /°                                 | 103.755(3)                                                       |
| Volume/Å <sup>3</sup>                       | 1531.52(14)                                                      |
| Z                                           | 2                                                                |
| $\rho_{\text{calc}}$ /cm <sup>3</sup>       | 1.632                                                            |
| $\mu$ /mm <sup>-1</sup>                     | 3.869                                                            |
| F(000)                                      | 744.0                                                            |
| Crystal size/mm <sup>3</sup>                | 0.12 × 0.11 × 0.04                                               |
| Absorption correction                       | empirical                                                        |
| Tmin; Tmax                                  | 0.625; 0.7460                                                    |
| Radiation                                   | MoK $\alpha$ ( $\lambda$ = 0.71073)                              |
| 2 $\theta$ range for data collection/°      | 5.272 to 50.05°                                                  |
| Completeness to theta                       | 0.890                                                            |
| Index ranges                                | -11 ≤ h ≤ 11, -10 ≤ k ≤ 12, -20 ≤ l ≤ 20                         |
| Reflections collected                       | 11086                                                            |
| Independent reflections                     | 4823 [ $R_{\text{int}}$ = 0.1137, $R_{\text{sigma}}$ = 0.2368]   |
| Data/restraints/parameters                  | 4823/66/383                                                      |
| Goodness-of-fit on F <sup>2</sup>           | 0.963                                                            |
| Final R indexes [ $I \geq 2\sigma(I)$ ]     | $R_1$ = 0.0532, $wR_2$ = 0.0930                                  |
| Final R indexes [all data]                  | $R_1$ = 0.1433, $wR_2$ = 0.1130                                  |
| Largest diff. peak/hole / e Å <sup>-3</sup> | 3.00/-3.53                                                       |

**Table SI 2.** Crystal data and structure refinement for **4a**.

|                     |                                                    |
|---------------------|----------------------------------------------------|
| Identification code | GSTR421, JMV474 // GXray4100f                      |
| Device Type         | Bruker X8-KappaApexII                              |
| Empirical formula   | C <sub>29</sub> H <sub>24</sub> NO <sub>5</sub> PW |
| Moiety formula      | C29 H24 N O5 P W                                   |
| Formula weight      | 681.31                                             |

|                                             |                                                               |
|---------------------------------------------|---------------------------------------------------------------|
| Temperature/K                               | 100                                                           |
| Crystal system                              | monoclinic                                                    |
| Space group                                 | P2 <sub>1</sub> /n                                            |
| a/Å                                         | 13.1709(10)                                                   |
| b/Å                                         | 13.0975(9)                                                    |
| c/Å                                         | 15.6670(12)                                                   |
| α/°                                         | 90                                                            |
| β/°                                         | 91.408(2)                                                     |
| γ/°                                         | 90                                                            |
| Volume/Å <sup>3</sup>                       | 2701.8(3)                                                     |
| Z                                           | 4                                                             |
| ρ <sub>calc</sub> /g/cm <sup>3</sup>        | 1.675                                                         |
| μ/mm <sup>-1</sup>                          | 4.373                                                         |
| F(000)                                      | 1336.0                                                        |
| Crystal size/mm <sup>3</sup>                | 0.24 × 0.22 × 0.2                                             |
| Absorption correction                       | empirical                                                     |
| Tmin; Tmax                                  | 0.4719; 0.7460                                                |
| Radiation                                   | MoKα (λ = 0.71073)                                            |
| 2θ range for data collection/°              | 5.06 to 55.996°                                               |
| Completeness to theta                       | 0.995                                                         |
| Index ranges                                | -17 ≤ h ≤ 16, -17 ≤ k ≤ 14, -20 ≤ l ≤ 20                      |
| Reflections collected                       | 26300                                                         |
| Independent reflections                     | 6503 [R <sub>int</sub> = 0.0405, R <sub>sigma</sub> = 0.0355] |
| Data/restraints/parameters                  | 6503/0/337                                                    |
| Goodness-of-fit on F <sup>2</sup>           | 1.048                                                         |
| Final R indexes [I ≥ 2σ (I)]                | R <sub>1</sub> = 0.0217, wR <sub>2</sub> = 0.0460             |
| Final R indexes [all data]                  | R <sub>1</sub> = 0.0265, wR <sub>2</sub> = 0.0473             |
| Largest diff. peak/hole / e Å <sup>-3</sup> | 0.78/-0.63                                                    |

**Table SI 3.** Crystal data and structure refinement for **5**.

|                     |                                                                   |
|---------------------|-------------------------------------------------------------------|
| Identification code | GSTR386, JMV416 // GXray3815                                      |
| Device Type         | STOE IPDS 2T                                                      |
| Empirical formula   | C <sub>31</sub> H <sub>29</sub> N <sub>2</sub> O <sub>5</sub> PSW |
| Formula weight      | 756.44                                                            |
| Temperature/K       | 123(2)                                                            |
| Crystal system      | triclinic                                                         |
| Space group         | P $\bar{1}$                                                       |
| a/Å                 | 9.6390(6)                                                         |
| b/Å                 | 9.9715(5)                                                         |
| c/Å                 | 16.9758(11)                                                       |
| α/°                 | 78.438(5)                                                         |
| β/°                 | 89.320(5)                                                         |

|                                                |                                                                  |
|------------------------------------------------|------------------------------------------------------------------|
| $\gamma/^\circ$                                | 73.325(4)                                                        |
| Volume/ $\text{\AA}^3$                         | 1529.49(16)                                                      |
| Z                                              | 2                                                                |
| $\rho_{\text{calc}}/\text{g}/\text{cm}^3$      | 1.643                                                            |
| $\mu/\text{mm}^{-1}$                           | 3.938                                                            |
| F(000)                                         | 748.0                                                            |
| Crystal size/ $\text{mm}^3$                    | 0.12 × 0.09 × 0.03                                               |
| Absorption correction                          | integration                                                      |
| Tmin; Tmax                                     | 0.4692; 0.6566                                                   |
| Radiation                                      | MoK $\alpha$ ( $\lambda = 0.71073$ )                             |
| 2 $\Theta$ range for data collection/ $^\circ$ | 5.22 to 50.5 $^\circ$                                            |
| Completeness to theta                          | 0.976                                                            |
| Index ranges                                   | -11 ≤ h ≤ 11, -11 ≤ k ≤ 11, -20 ≤ l ≤ 19                         |
| Reflections collected                          | 10474                                                            |
| Independent reflections                        | 5403 [ $R_{\text{int}} = 0.0652$ , $R_{\text{sigma}} = 0.1334$ ] |
| Data/restraints/parameters                     | 5403/0/374                                                       |
| Goodness-of-fit on $F^2$                       | 0.899                                                            |
| Final R indexes [ $I \geq 2\sigma(I)$ ]        | $R_1 = 0.0429$ , $wR_2 = 0.0726$                                 |
| Final R indexes [all data]                     | $R_1 = 0.0694$ , $wR_2 = 0.0762$                                 |
| Largest diff. peak/hole / e $\text{\AA}^{-3}$  | 1.27/-1.04                                                       |

## Computational details

DFT calculations were performed with the ORCA program.<sup>2</sup> All geometry optimizations were run in redundant internal coordinates with tight convergence criteria and using the B3LYP functional<sup>3</sup> together with the def2-TZVP basis set.<sup>4</sup> For W atoms the [SD(60,MWB)] effective core potential<sup>5</sup> (ECP) was used. The latest Grimme's semiempirical atom-pair-wise London dispersion correction (DFT-D3) was included in all calculations.<sup>6</sup> Solvent effects (toluene by default) were taken into account via the COSMO solvation model.<sup>7</sup> Harmonic frequency calculations verified the nature of ground states or transition states (TS) having all positive frequencies or only one imaginary frequency, respectively. From these optimized geometries all reported data were obtained by means of single-point (SP) calculations using the more polarized def2-TZVPP<sup>8</sup> basis set. Reported energies were corrected for the zero-point vibrational term at the optimization level and obtained by means of the recently developed near linear scaling domain-based local pair natural orbital (DLPNO) method<sup>9</sup> to achieve coupled cluster theory with single-double and perturbative triple excitations (CCSD(T)). For the sake of comparison, in case of all model systems, energy values were also computed with other high level single reference method, such as CEPA (Coupled Electron-Pair Approximation),<sup>10</sup> here the slightly modified NCEPA/1 version implemented in ORCA was used,<sup>11</sup> with the aid of local pair natural orbital (LPNO) schemes;<sup>12</sup> the spin component-scaled Møller-Plesset 2 (SCS-MP2) method<sup>13</sup> and the double-hybrid-meta-GGA functional PWPB95<sup>14</sup> together with the D3 correction were also used. For a set of twenty-six values with model systems (see Table SI 4), the LPNO-NCEPA1 method performed very accurately according to the small RMSD (root mean square deviation) displayed (0.22 kcal/mol) in relation to DLPNO-CCSD(T); among the less computationally demanding methods, therefore accessible for bigger molecular systems, SCS-MP2 clearly outperformed (RMSD = 0.23 kcal/mol) PWPB95-D3 (RMSD = 0.88 kcal/mol). Basis set superposition errors (BSSE) were computed for every series at the **6''**·CO and the **6''**·CNMe stages. Wiberg bond indices (WBI) were obtained from the natural bond orbital (NBO) population analysis.<sup>15</sup> Bader's AIM-derived topological analysis of the electron density was conducted with AIM2000.<sup>16</sup> Bond dissociation energies (BDE) for complexes displayed in Table 1 were computed according to the scission reaction  $[W]P(R)-L \rightarrow [W]PR + :L$ .

---



### Theoretical study of the P-N bond cleavage process in E-configured imino-azaphosphiridine complexes.

Ring opening via increase of the endocyclic PCN bond angle of the 3.07 kcal/mol less stable *E*-isomer **1''<sup>E</sup>** allowed racemisation at P through a high energy transition state ( $\Delta E_{\text{ZPE}}^{\ddagger} = 40.76$  kcal/mol):

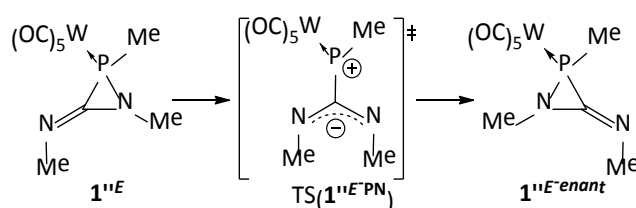

**Scheme SI 2.** P-N ring cleavage for model complex **1''<sup>E</sup>**.

### Theoretical study of the thionation reaction of **1''**.

Preliminary studies of the reaction of imino-azaphosphiridine complexes **1** with heavier chalcogens was computationally addressed for the case of the thionation process leading to model 4-imino-1,3,2-thiazaphosphetidine complex **5''**, assuming the intermediacy of a carbo-diimide *end-on* adduct with a phosphinidene-thione complex **13''**. This intermediate results from direct *P*-thionation of the open-chain derivative **6''** and quickly cyclizes to **5''** in an exergonic ( $\Delta E_{\text{ZPE}} = -18.80$  kcal/mol) almost barrierless process ( $\Delta E_{\text{ZPE}}^{\ddagger} = 1.70$  kcal/mol).

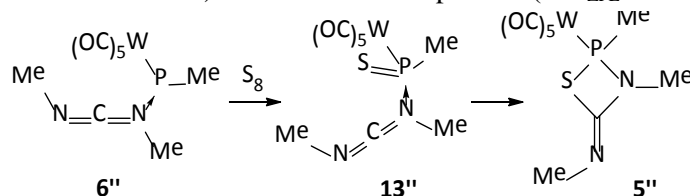

**Scheme SI 3.** Proposed mechanism for the formation of complexes **5''**.

**Table SI 4:** Relative zero-point corrected energies (kcal/mol) computed at the optimization level<sup>[a]</sup> and as single-points at other selected levels.<sup>[b]</sup>

| Level        | <b>1''</b> | <b>TS(1''→6'')</b> | <b>6''</b> | <b>TS(1''→7'')</b> | <b>7''</b> | <b>1''<sup>E</sup></b> | <b>TS(1''<sup>E</sup>-PN)</b> |
|--------------|------------|--------------------|------------|--------------------|------------|------------------------|-------------------------------|
| Optimization | 0.00       | 13.27              | 10.82      | 34.57              | -6.73      | 3.50                   | 35.67                         |
| B3LYP-D3     | 0.00       | 17.03              | 14.53      | 38.13              | -2.89      | 7.25                   | 39.41                         |
| PWPB95-D3    | 0.00       | 15.70              | 13.45      | 38.43              | -3.74      | 3.25                   | 39.28                         |
| SCS-MP2      | 0.00       | 16.61              | 13.42      | 41.08              | -5.60      | 3.12                   | 40.40                         |
| LPNO-NCEPA/1 | 0.00       | 18.51              | 14.21      | 41.23              | -7.70      | 2.97                   | 40.44                         |

|               |      |       |       |       |       |      |       |
|---------------|------|-------|-------|-------|-------|------|-------|
| DLPNO-CCSD(T) | 0.00 | 17.92 | 13.88 | 40.33 | -6.80 | 3.07 | 40.76 |
|---------------|------|-------|-------|-------|-------|------|-------|

**Table SI 4** (continued)

| 1" + CO | 6".CO | TS <sup>(6".CO→8".9)</sup> | 8".9   | TS <sup>(8".9→10")</sup> | 10"   | TS <sup>(10"→2")</sup> | 2"     | TS <sup>(2"→4".11)</sup> | 4".11  |
|---------|-------|----------------------------|--------|--------------------------|-------|------------------------|--------|--------------------------|--------|
| 0.00    | 8.06  | 11.85                      | 1.94   | 3.38                     | 1.72  | 2.18                   | -34.13 | 15.63                    | -10.35 |
| 0.00    | 11.79 | 15.58                      | -16.07 | 6.30                     | 5.44  | 5.89                   | -30.40 | 19.36                    | -6.59  |
| 0.00    | 12.13 | 16.67                      | 6.79   | 9.22                     | 6.11  | 6.78                   | -32.12 | 20.55                    | -5.83  |
| 0.00    | 13.44 | 20.82                      | 10.68  | 14.40                    | 11.92 | 12.28                  | -27.00 | 26.03                    | -2.35  |
| 0.00    | 14.07 | 22.66                      | 12.94  | 16.99                    | 13.80 | 14.98                  | -27.29 | 28.54                    | 0.76   |
| 0.00    | 13.75 | 21.26                      | 11.84  | 15.12                    | 12.68 | 13.59                  | -27.68 | 26.86                    | 0.38   |

**Table SI 4** (continued)

| 1"+NCMe | 6".NCMe | TS <sup>(3".CNMe→4".9)</sup> | 4".9   | TS <sup>(4".9→12")</sup> | 12"    | 13"  | TS <sup>(13"→5")</sup> | 5"     | TS <sup>(4".9→12")</sup> |
|---------|---------|------------------------------|--------|--------------------------|--------|------|------------------------|--------|--------------------------|
| 0.00    | 6.32    | 7.23                         | -10.56 | 1.50                     | -37.66 | 0.00 | 1.38                   | -15.22 | 1.50                     |
| 0.00    | 10.02   | 10.95                        | -6.83  | -9.22                    | -33.90 | 0.00 | 1.39                   | -15.21 | -9.22                    |
| 0.00    | 9.93    | 11.23                        | -6.53  | 5.96                     | -36.74 | 0.00 | 1.13                   | -17.82 | 5.96                     |
| 0.00    | 11.52   | 13.99                        | -3.27  | 10.29                    | -33.54 | 0.00 | 1.34                   | -16.97 | 10.29                    |
| 0.00    | 12.22   | 15.80                        | -0.78  | 12.97                    | -34.12 | 0.00 | 1.85                   | -19.13 | 12.97                    |
| 0.00    | 11.85   | 14.53                        | -1.74  | 11.06                    | -34.82 | 0.00 | 1.70                   | -18.80 | 11.06                    |

**Table SI 4** (continued)

| BDE(4") | BDE(6") | BDE(8") | RMSE <sup>[c]</sup> |
|---------|---------|---------|---------------------|
| 38.92   | 23.10   | 26.10   | 1.51                |
| 37.73   | 23.15   | 26.12   | 1.69                |
| 38.32   | 22.67   | 24.40   | 0.88                |
| 33.73   | 18.93   | 18.14   | 0.23                |
| 29.11   | 17.23   | 15.13   | 0.22                |
| 31.22   | 18.65   | 16.72   | 0.00                |

<sup>[a]</sup> COSMO<sub>toluene</sub>/B3LYP-D3/def2-TZVPecp. <sup>[b]</sup> COSMO<sub>toluene</sub>/level/def2-TZVPecp.

<sup>[c]</sup> Root mean square deviation for 26 energy values, taking all non-zero columns, relative to the DLPNO-CCSD(T) level.

## Calculated structures

Cartesian coordinates (in Å) and energies for all computed species

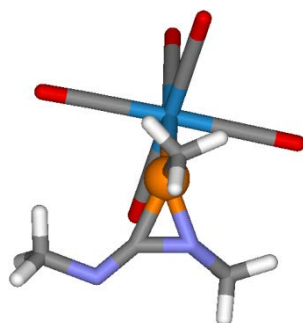

**1'':** E = -1240.35612103398 au (COSMO<sub>tol</sub>/DLPNO-CCSD(T)/def2-TZVPPecp)

ZPE = 0.17158604 au (COSMO<sub>tol</sub>/B3LYP-D3/def2-TZVPPecp)

|   |           |           |          |   |           |           |           |
|---|-----------|-----------|----------|---|-----------|-----------|-----------|
| N | 0.094696  | -0.102987 | 0.035571 | O | 1.939200  | -1.486325 | 4.952313  |
| P | -0.034856 | -0.083193 | 1.777785 | C | -0.617560 | 1.588329  | 2.200616  |
| C | 1.334896  | -0.048005 | 0.595423 | H | -1.708625 | 1.600039  | 2.182847  |
| N | 2.532152  | -0.171895 | 0.255220 | H | -0.287124 | 1.820384  | 3.214602  |
| W | -0.643736 | -2.078125 | 3.137676 | H | -0.223311 | 2.324810  | 1.503283  |
| C | -1.123243 | -3.709762 | 4.262519 | C | -0.386558 | -0.989739 | -1.014316 |
| O | -1.395097 | -4.626578 | 4.894700 | H | -1.456646 | -0.840297 | -1.141842 |
| C | -1.807836 | -0.882106 | 4.352031 | H | 0.122435  | -0.740477 | -1.944731 |
| O | -2.455160 | -0.212110 | 5.016980 | H | -0.190465 | -2.038463 | -0.776184 |
| C | -2.281041 | -2.417301 | 1.922425 | C | 3.558945  | -0.085252 | 1.281128  |
| O | -3.188739 | -2.598758 | 1.249799 | H | 3.151352  | 0.143038  | 2.273241  |
| C | 0.536178  | -3.240668 | 1.900084 | H | 4.097610  | -1.033766 | 1.334756  |
| O | 1.196559  | -3.877757 | 1.217255 | H | 4.282165  | 0.685859  | 1.008625  |
| C | 1.012813  | -1.703575 | 4.317761 |   |           |           |           |

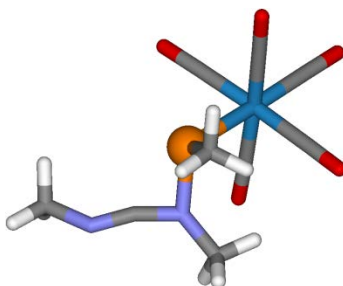

**TS(1''→6'')**: E = -1240.32595984979 au (COSMO<sub>tol</sub>/DLPNO-CCSD(T)/def2-TZVPPecp)

ZPE = 0.16998294 au (COSMO<sub>tol</sub>/B3LYP-D3/def2-TZVPPecp)

$\nu = -224.80 \text{ cm}^{-1}$

|   |           |           |          |   |           |           |           |
|---|-----------|-----------|----------|---|-----------|-----------|-----------|
| N | 0.578918  | -0.420263 | 0.460548 | O | -3.432787 | -1.806179 | 1.432134  |
| P | 0.159670  | -0.066919 | 2.182149 | C | 0.045796  | -3.347163 | 1.869126  |
| C | 1.785074  | -0.010547 | 0.530279 | O | 0.568042  | -3.972934 | 1.060225  |
| N | 2.884436  | 0.378602  | 0.280490 | C | 0.863303  | -2.309444 | 4.439819  |
| W | -0.849581 | -2.164349 | 3.292768 | O | 1.821472  | -2.384653 | 5.063125  |
| C | -1.683808 | -3.760797 | 4.212287 | C | -1.087559 | 1.267537  | 1.916153  |
| O | -2.179511 | -4.662951 | 4.728097 | H | -1.967072 | 0.899936  | 1.384497  |
| C | -1.670154 | -0.890180 | 4.692982 | H | -1.405418 | 1.616391  | 2.900807  |
| O | -2.115493 | -0.170031 | 5.465602 | H | -0.654942 | 2.108990  | 1.373631  |
| C | -2.512857 | -1.944996 | 2.105040 | C | -0.073700 | -1.091607 | -0.671365 |

|   |           |           |           |   |          |           |          |
|---|-----------|-----------|-----------|---|----------|-----------|----------|
| H | -0.919800 | -1.647673 | -0.277765 | H | 4.061159 | 0.636843  | 1.971124 |
| H | -0.424421 | -0.351556 | -1.390346 | H | 4.683460 | -0.543078 | 0.791221 |
| H | 0.619704  | -1.779713 | -1.151615 | H | 4.783353 | 1.194007  | 0.440830 |
| C | 4.181723  | 0.418048  | 0.907724  |   |          |           |          |

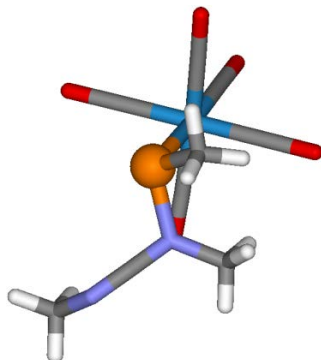

**6<sup>‡</sup>:** E = -1240.33424534319 au (COSMO<sub>tol</sub>/DLPNO-CCSD(T)/def2-TZVPPecp)

ZPE = 0.17183463 au (COSMO<sub>tol</sub>/B3LYP-D3/def2-TZVPPecp)

|   |           |           |          |   |           |           |           |
|---|-----------|-----------|----------|---|-----------|-----------|-----------|
| N | 0.617075  | 0.014547  | 0.679948 | O | 1.584468  | -1.757380 | 5.489984  |
| P | -0.002287 | 0.292158  | 2.444853 | C | -1.501533 | 1.268459  | 1.969954  |
| C | 1.867197  | 0.086375  | 0.567736 | H | -2.237112 | 0.713345  | 1.387187  |
| N | 3.031417  | 0.261716  | 0.457588 | H | -1.971740 | 1.547649  | 2.916194  |
| W | -0.717780 | -2.068023 | 3.271953 | H | -1.228875 | 2.187498  | 1.448359  |
| C | -1.238191 | -3.883582 | 4.003513 | C | -0.206613 | -0.473688 | -0.445820 |
| O | -1.545637 | -4.918840 | 4.404428 | H | -0.610905 | -1.448824 | -0.188962 |
| C | -2.033090 | -1.070503 | 4.513193 | H | -1.019635 | 0.229490  | -0.605690 |
| O | -2.747039 | -0.477468 | 5.186377 | H | 0.399462  | -0.546494 | -1.346301 |
| C | -2.189264 | -2.194930 | 1.845494 | C | 4.244441  | -0.490474 | 0.718957  |
| O | -3.013760 | -2.253024 | 1.046655 | H | 4.809546  | 0.040976  | 1.482831  |
| C | 0.673717  | -2.823558 | 1.977146 | H | 4.017342  | -1.502372 | 1.050894  |
| O | 1.483357  | -3.150921 | 1.224494 | H | 4.835206  | -0.514688 | -0.194463 |
| C | 0.759235  | -1.872126 | 4.703067 |   |           |           |           |

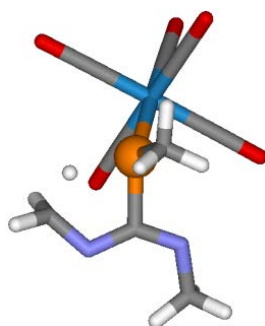

**TS(1<sup>''</sup>→7<sup>''</sup>):** E = -1240.28576903883 au (COSMO<sub>tol</sub>/DLPNO-CCSD(T)/def2-TZVPPecp)

ZPE = 0.16550496 au (COSMO<sub>tol</sub>/B3LYP-D3/def2-TZVPPecp)

$\nu = -783.96 \text{ cm}^{-1}$

|   |           |           |           |   |           |           |          |
|---|-----------|-----------|-----------|---|-----------|-----------|----------|
| N | -0.239736 | -0.309059 | -0.330187 | C | -1.115776 | -3.804462 | 4.304959 |
| P | 0.333370  | -0.115453 | 2.192964  | O | -1.506860 | -4.749173 | 4.816141 |
| C | 0.816808  | -0.170504 | 0.380398  | C | -1.639344 | -0.917812 | 4.562266 |
| N | 2.115552  | -0.023353 | 0.157504  | O | -2.299868 | -0.244763 | 5.209057 |
| W | -0.428538 | -2.099024 | 3.378585  | C | -1.943996 | -2.279927 | 1.960656 |

|   |           |           |          |   |           |           |           |
|---|-----------|-----------|----------|---|-----------|-----------|-----------|
| O | -2.764195 | -2.382365 | 1.177398 | C | -0.100236 | -0.771715 | -1.699830 |
| C | 0.812654  | -3.196021 | 2.143217 | H | -0.886191 | -0.333419 | -2.315604 |
| O | 1.504199  | -3.782450 | 1.447250 | H | 0.882157  | -0.516652 | -2.114220 |
| C | 1.098016  | -1.937004 | 4.773128 | H | -0.211699 | -1.860219 | -1.745091 |
| O | 1.943313  | -1.844018 | 5.535433 | C | 2.895099  | -0.126088 | 1.274649  |
| C | -0.418707 | 1.525734  | 2.409025 | H | 2.086265  | 0.189619  | 2.238152  |
| H | -0.771410 | 1.670598  | 3.428035 | H | 3.118845  | -1.125738 | 1.667375  |
| H | 0.282797  | 2.310741  | 2.127036 | H | 3.764662  | 0.531148  | 1.311155  |
| H | -1.268176 | 1.556701  | 1.720118 |   |           |           |           |

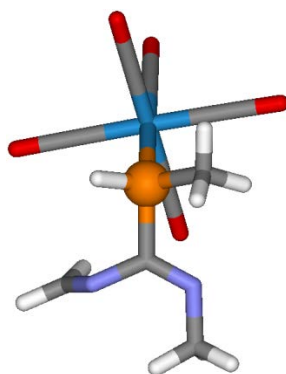

7<sup>o</sup>: E = -1240.36489581074 au (COSMO<sub>tol</sub>/DLPNO-CCSD(T)/def2-TZVPPecp)  
 ZPE = 0.16951685 au (COSMO<sub>tol</sub>/B3LYP-D3/def2-TZVPPecp)

|   |           |           |           |   |           |           |           |
|---|-----------|-----------|-----------|---|-----------|-----------|-----------|
| N | 0.194463  | -0.026224 | -0.519154 | O | 2.507118  | -1.886931 | 4.815340  |
| P | 0.130867  | -0.029106 | 2.183581  | C | -1.154141 | 1.215764  | 1.853701  |
| C | 0.832481  | -0.386181 | 0.511553  | H | -1.521647 | 1.586694  | 2.810904  |
| N | 1.976642  | -1.197340 | 0.524155  | H | -0.766195 | 2.035582  | 1.253096  |
| W | -0.472008 | -2.009193 | 3.636589  | H | -1.973796 | 0.737385  | 1.320201  |
| C | -0.980592 | -3.533951 | 4.874876  | C | 0.707260  | -0.383997 | -1.835255 |
| O | -1.270097 | -4.386210 | 5.588070  | H | -0.126544 | -0.431365 | -2.534487 |
| C | -1.128289 | -0.655083 | 5.042910  | H | 1.391535  | 0.393590  | -2.186903 |
| O | -1.500225 | 0.101096  | 5.819670  | H | 1.247413  | -1.335251 | -1.836483 |
| C | -2.349303 | -2.023653 | 2.777395  | C | 3.110288  | -0.750545 | 0.857756  |
| O | -3.387886 | -2.023897 | 2.295397  | H | 1.187669  | 0.762094  | 2.683644  |
| C | 0.179835  | -3.367642 | 2.214366  | H | 3.292690  | 0.292016  | 1.133401  |
| O | 0.534477  | -4.132240 | 1.442679  | H | 3.960579  | -1.428142 | 0.870961  |
| C | 1.436413  | -1.941950 | 4.411605  |   |           |           |           |

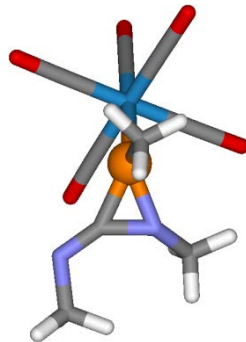

1<sup>oE</sup>: E = -1240.35114773954 au (COSMO<sub>tol</sub>/DLPNO-CCSD(T)/def2-TZVPPecp)  
 ZPE = 0.17150406 au (COSMO<sub>tol</sub>/B3LYP-D3/def2-TZVPPecp)

|   |           |          |          |   |          |          |          |
|---|-----------|----------|----------|---|----------|----------|----------|
| N | -0.072660 | 0.020037 | 0.276399 | P | 1.678396 | 0.020628 | 0.215762 |
|---|-----------|----------|----------|---|----------|----------|----------|

|   |          |           |           |   |           |           |           |
|---|----------|-----------|-----------|---|-----------|-----------|-----------|
| C | 0.428984 | 1.263355  | -0.061755 | C | 2.234680  | -0.000474 | 1.946542  |
| N | 0.108071 | 2.400461  | -0.475060 | H | 2.339276  | -1.035449 | 2.275262  |
| W | 2.974590 | -1.030346 | -1.633283 | H | 3.213917  | 0.479165  | 1.995378  |
| C | 4.023334 | -1.843494 | -3.179963 | H | 1.530263  | 0.528787  | 2.585469  |
| O | 4.608227 | -2.305972 | -4.050783 | C | -1.055566 | -0.796030 | -0.429734 |
| C | 4.079627 | -2.128940 | -0.282547 | H | -1.004293 | -1.813637 | -0.047633 |
| O | 4.690677 | -2.740763 | 0.467789  | H | -2.054392 | -0.403009 | -0.245368 |
| C | 1.620800 | -2.582609 | -1.759557 | H | -0.874049 | -0.809110 | -1.507593 |
| O | 0.879243 | -3.451820 | -1.830098 | C | -1.301685 | 2.691114  | -0.726468 |
| C | 1.821340 | 0.085296  | -2.939196 | H | -1.990069 | 1.987447  | -0.249140 |
| O | 1.164184 | 0.698015  | -3.646010 | H | -1.522737 | 3.696267  | -0.366424 |
| C | 4.350736 | 0.509934  | -1.482672 | H | -1.483080 | 2.683258  | -1.804362 |
| O | 5.119070 | 1.350991  | -1.388381 |   |           |           |           |

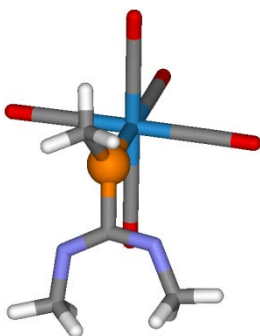

**TS(1<sup>..E-PN</sup>):**

E = -1240.28876936083 au (COSMO<sub>tol</sub>/DLPNO-CCSD(T)/def2-TZVPecp)

ZPE = 0.16919317 au (COSMO<sub>tol</sub>/B3LYP-D3/def2-TZVPecp)

$\nu = -165.33 \text{ cm}^{-1}$

|   |           |           |           |   |           |           |           |
|---|-----------|-----------|-----------|---|-----------|-----------|-----------|
| N | -0.390732 | -0.243965 | 0.114833  | O | 4.696862  | 2.715579  | -1.919322 |
| P | 2.054198  | 0.382273  | 0.064177  | C | 2.596293  | 0.504780  | 1.787477  |
| C | 0.317797  | 0.841819  | -0.011015 | H | 3.646098  | 0.246639  | 1.906124  |
| N | 0.243095  | 2.113704  | -0.275855 | H | 2.416816  | 1.529404  | 2.123590  |
| W | 3.380960  | -0.224837 | -1.839613 | H | 1.970006  | -0.160133 | 2.387704  |
| C | 4.516876  | -0.725335 | -3.493769 | C | -1.760730 | -0.353634 | -0.357547 |
| O | 5.149874  | -0.998729 | -4.403576 | H | -2.057692 | -1.402993 | -0.346082 |
| C | 4.856902  | -0.882690 | -0.560751 | H | -2.450935 | 0.187562  | 0.302251  |
| O | 5.650450  | -1.243931 | 0.178570  | H | -1.893983 | 0.028987  | -1.374144 |
| C | 2.524254  | -2.125652 | -1.883384 | C | -0.912432 | 2.750678  | -0.886362 |
| O | 2.047159  | -3.158529 | -1.915354 | H | -1.861347 | 2.383430  | -0.480752 |
| C | 1.800959  | 0.451030  | -3.001283 | H | -0.861410 | 3.825410  | -0.708333 |
| O | 0.911820  | 0.818282  | -3.613196 | H | -0.930549 | 2.593645  | -1.970464 |
| C | 4.233850  | 1.675412  | -1.884979 |   |           |           |           |

**CO:**

E = -113.158011405906 au (COSMO<sub>tol</sub>/DLPNO-CCSD(T)/def2-TZVPecp)

ZPE = 0.0050358 au (COSMO<sub>tol</sub>/B3LYP-D3/def2-TZVPecp)

|   |          |          |          |   |          |          |          |
|---|----------|----------|----------|---|----------|----------|----------|
| C | 0.000000 | 0.000000 | 0.000000 | O | 1.124879 | 0.000000 | 0.000000 |
|---|----------|----------|----------|---|----------|----------|----------|

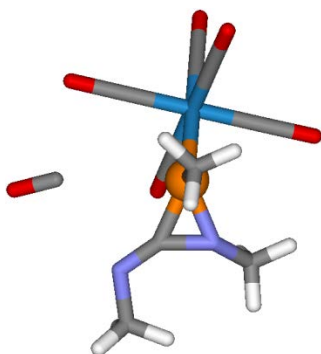

**1''<sup>E</sup>.CO:** E = -1353.512786649725 au (COSMO<sub>tol</sub>/DLPNO-CCSD(T)/def2-TZVPPecp)

ZPE = 0.17724514 au (COSMO<sub>tol</sub>/B3LYP-D3/def2-TZVPPecp)

d<sub>P...CO</sub> = 3.451 Å; WBI = 0.009; ρ(r) = 0.70·10<sup>-2</sup> e/a<sub>0</sub><sup>3</sup>;

d<sub>N...CO</sub> = 3.161 Å; WBI = 0.008; ρ(r) = 0.68·10<sup>-2</sup> e/a<sub>0</sub><sup>3</sup>)

|   |           |           |           |   |           |           |           |
|---|-----------|-----------|-----------|---|-----------|-----------|-----------|
| N | -0.153729 | -0.373446 | 0.335724  | C | 2.444394  | -0.953226 | 1.290395  |
| P | 1.528620  | -0.182859 | -0.081576 | H | 2.547386  | -2.020212 | 1.084808  |
| C | 0.215593  | 0.922133  | 0.503594  | H | 3.438826  | -0.509270 | 1.336376  |
| N | -0.318497 | 2.035584  | 0.705653  | H | 1.925135  | -0.803626 | 2.234922  |
| W | 2.413519  | -0.308285 | -2.409812 | C | -1.350208 | -0.917933 | -0.289025 |
| C | 3.183969  | -0.443886 | -4.292226 | H | -1.121811 | -1.905618 | -0.685526 |
| O | 3.624984  | -0.525949 | -5.347134 | H | -2.138832 | -1.011944 | 0.457677  |
| C | 4.310918  | -0.522738 | -1.630738 | H | -1.701684 | -0.271677 | -1.095768 |
| O | 5.362830  | -0.637531 | -1.193835 | C | 0.522120  | 3.220875  | 0.733175  |
| C | 2.131259  | -2.353186 | -2.341784 | H | 0.375363  | 3.750425  | 1.676630  |
| O | 1.959998  | -3.483751 | -2.292297 | H | 1.586513  | 2.988160  | 0.617020  |
| C | 0.514358  | -0.075514 | -3.192187 | H | 0.224412  | 3.896435  | -0.071383 |
| O | -0.530458 | 0.059372  | -3.637492 | C | 4.341000  | 2.161428  | 0.517280  |
| C | 2.616457  | 1.748548  | -2.418344 | O | 4.974744  | 3.050108  | 0.248452  |
| O | 2.708910  | 2.888322  | -2.404420 |   |           |           |           |

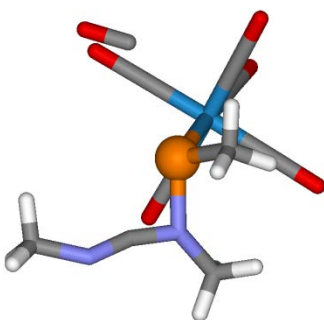

**TS(1''<sup>E</sup>.CO→6''CO):**

E = -1353.48688685051 au (COSMO<sub>tol</sub>/DLPNO-CCSD(T)/def2-TZVPPecp)

ZPE = 0.17581876 au (COSMO<sub>tol</sub>/B3LYP-D3/def2-TZVPPecp)

ν = -224.91 cm<sup>-1</sup>

|   |           |           |           |   |           |           |           |
|---|-----------|-----------|-----------|---|-----------|-----------|-----------|
| N | 0.198089  | 0.567102  | -0.040703 | O | 5.405540  | -1.231471 | -1.193125 |
| P | 1.978151  | 0.706954  | -0.332264 | C | 1.750942  | -2.206338 | -1.708907 |
| C | 0.005862  | 1.817523  | 0.122344  | O | 1.286488  | -3.142356 | -1.233351 |
| N | -0.453822 | 2.878241  | 0.420435  | C | 0.757981  | 0.050037  | -3.302677 |
| W | 2.576414  | -0.510610 | -2.526826 | O | -0.260696 | 0.389713  | -3.710426 |
| C | 3.061581  | -1.526463 | -4.205897 | C | 3.384839  | 1.227113  | -3.296598 |
| O | 3.331429  | -2.125011 | -5.151572 | O | 3.825735  | 2.190522  | -3.732802 |
| C | 4.397479  | -0.979158 | -1.675344 | C | 2.582463  | -0.185443 | 1.165306  |

|   |           |           |           |   |           |          |           |
|---|-----------|-----------|-----------|---|-----------|----------|-----------|
| H | 2.295783  | -1.238166 | 1.151530  | C | -0.301978 | 4.258411 | 0.033723  |
| H | 3.671480  | -0.125965 | 1.160337  | H | -0.896326 | 4.465454 | -0.856828 |
| H | 2.213007  | 0.284342  | 2.077469  | H | -0.640901 | 4.898283 | 0.844901  |
| C | -0.811420 | -0.489669 | -0.178805 | H | 0.750152  | 4.461545 | -0.178442 |
| H | -0.919733 | -0.767637 | -1.225372 | C | 4.821971  | 2.277809 | -0.316552 |
| H | -0.482858 | -1.354426 | 0.393324  | O | 4.982828  | 3.288127 | -0.785527 |
| H | -1.763272 | -0.133163 | 0.209787  |   |           |          |           |

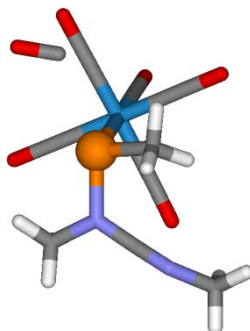

**6<sup>..</sup>·CO:** E = -1353.49389432525 au (COSMO<sub>tol</sub>/DLPNO-CCSD(T)/def2-TZVPPecp)  
 ZPE = 0.17769235 au (COSMO<sub>tol</sub>/B3LYP-D3/def2-TZVPPecp)  
 BSSE = 0.00060698 au (DLPNO-CCSD(T)/def2-TZVPPecp)

|   |           |           |           |   |           |           |           |
|---|-----------|-----------|-----------|---|-----------|-----------|-----------|
| N | 0.179129  | 1.275388  | -0.546548 | C | 2.738660  | 1.800714  | 0.402702  |
| P | 1.931199  | 1.475280  | -1.229541 | H | 2.704955  | 0.965995  | 1.104437  |
| C | -0.042401 | 1.050084  | 0.667130  | H | 3.786598  | 1.992787  | 0.166861  |
| N | -0.185964 | 0.997615  | 1.844377  | H | 2.330220  | 2.695986  | 0.874774  |
| W | 2.587136  | -0.910914 | -2.059322 | C | -0.923208 | 1.274610  | -1.528935 |
| C | 3.090320  | -2.755304 | -2.718959 | H | -0.662396 | 1.986770  | -2.308310 |
| O | 3.372394  | -3.812211 | -3.079849 | H | -1.027203 | 0.281190  | -1.960436 |
| C | 4.058193  | -0.994483 | -0.617466 | H | -1.852382 | 1.570716  | -1.047376 |
| O | 4.868187  | -1.033304 | 0.193214  | C | -0.294937 | -0.050530 | 2.841761  |
| C | 1.234864  | -1.635292 | -0.711271 | H | -0.180180 | -1.036370 | 2.395431  |
| O | 0.458038  | -1.969460 | 0.072727  | H | 0.475044  | 0.118374  | 3.592572  |
| C | 1.128234  | -0.753681 | -3.501308 | H | -1.267312 | 0.039014  | 3.323286  |
| O | 0.316886  | -0.662810 | -4.309587 | C | 4.201467  | 3.260828  | -2.554025 |
| C | 3.934814  | -0.050536 | -3.373290 | O | 3.994177  | 3.888817  | -3.465388 |
| O | 4.681558  | 0.411466  | -4.109502 |   |           |           |           |

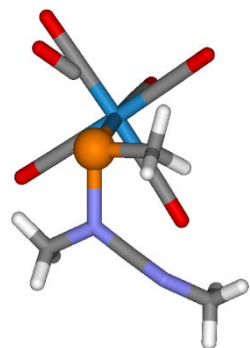

**TS(6<sup>..</sup>·CO→8<sup>..</sup>·9):** E = -1353.48254840981 au (COSMO<sub>tol</sub>/DLPNO-CCSD(T)/def2-TZVPPecp)  
 ZPE = 0.17830783 au (COSMO<sub>tol</sub>/B3LYP-D3/def2-TZVPPecp)  
 $\nu = -217.27 \text{ cm}^{-1}$



|   |           |           |           |   |           |           |           |
|---|-----------|-----------|-----------|---|-----------|-----------|-----------|
| N | 0.168843  | 1.302549  | -0.540176 | C | 2.726951  | 1.763794  | 0.501002  |
| P | 2.059226  | 1.599775  | -1.223696 | H | 2.551591  | 0.861534  | 1.085745  |
| C | -0.110128 | 1.091828  | 0.655555  | H | 3.801771  | 1.912707  | 0.445211  |
| N | -0.313185 | 1.039195  | 1.828446  | H | 2.279629  | 2.618704  | 1.009269  |
| W | 2.686912  | -0.788510 | -2.140395 | C | -0.874677 | 1.331585  | -1.579597 |
| C | 3.146592  | -2.668781 | -2.705277 | H | -0.453500 | 1.835833  | -2.446217 |
| O | 3.408601  | -3.749926 | -3.003984 | H | -1.159375 | 0.318097  | -1.855132 |
| C | 4.343056  | -0.713928 | -0.911230 | H | -1.746722 | 1.880025  | -1.227502 |
| O | 5.261444  | -0.651237 | -0.228946 | C | -0.440206 | -0.024876 | 2.806700  |
| C | 1.518264  | -1.500457 | -0.623123 | H | -0.270966 | -1.002299 | 2.359164  |
| O | 0.836024  | -1.869865 | 0.228328  | H | 0.284158  | 0.154845  | 3.599694  |
| C | 1.060580  | -0.767526 | -3.396708 | H | -1.438088 | 0.025248  | 3.240028  |
| O | 0.160967  | -0.767569 | -4.111110 | C | 3.805094  | 2.592666  | -2.132187 |
| C | 3.817941  | -0.037425 | -3.702795 | O | 4.087554  | 3.283984  | -2.988113 |
| O | 4.437741  | 0.350771  | -4.584795 |   |           |           |           |

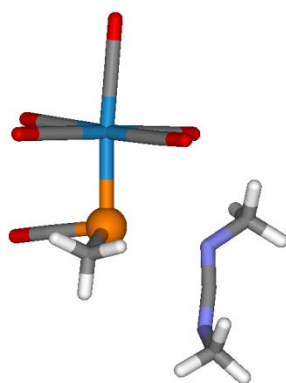

**8''-9:** E = -1353.49802199452 au (COSMO<sub>tol</sub>/DLPNO-CCSD(T)/def2-TZVPecp)

ZPE = 0.17877305 au (COSMO<sub>tol</sub>/B3LYP-D3/def2-TZVPecp)

P-CH<sub>3</sub> (in **8''**): d = 1.868 Å; WBI = 0.921;  $\rho(r) = 15.30 \cdot 10^{-2} e/a_0^3$ .

|   |           |           |           |   |           |           |           |
|---|-----------|-----------|-----------|---|-----------|-----------|-----------|
| N | -0.272129 | 0.541138  | -0.113615 | C | 2.891929  | 1.150001  | 0.656439  |
| P | 2.390746  | 1.416405  | -1.123789 | H | 2.207961  | 0.382544  | 1.014883  |
| C | -0.518206 | 1.183118  | 0.892562  | H | 3.912134  | 0.788605  | 0.753086  |
| N | -0.619878 | 1.918032  | 1.853467  | H | 2.748107  | 2.058336  | 1.237681  |
| W | 2.987675  | -0.645988 | -2.657662 | C | -1.231191 | 0.086499  | -1.112552 |
| C | 3.302506  | -2.304691 | -3.744437 | H | -0.988738 | 0.546641  | -2.070131 |
| O | 3.485747  | -3.259286 | -4.360526 | H | -1.142632 | -0.993383 | -1.224257 |
| C | 4.636898  | -1.049816 | -1.486649 | H | -2.259300 | 0.337283  | -0.846981 |
| O | 5.555284  | -1.265821 | -0.837293 | C | -0.840446 | 1.535688  | 3.241508  |
| C | 1.808772  | -1.774496 | -1.389320 | H | -0.844449 | 0.453041  | 3.382307  |
| O | 1.168283  | -2.434446 | -0.707898 | H | -0.054392 | 1.974788  | 3.856235  |
| C | 1.338607  | -0.169805 | -3.802374 | H | -1.794008 | 1.944115  | 3.577526  |
| O | 0.423259  | 0.091072  | -4.439240 | C | 3.742818  | 2.374395  | -1.589611 |
| C | 4.192467  | 0.429710  | -3.943046 | O | 4.535704  | 3.087114  | -2.008365 |
| O | 4.872563  | 1.019942  | -4.649786 |   |           |           |           |

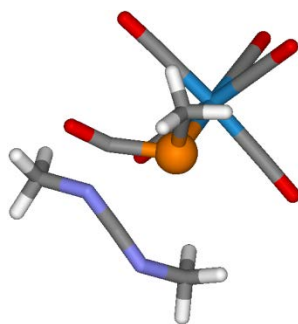

**TS(8''·9→10'')**: E = -1353.49324293658 au (COSMO<sub>tol</sub>/DLPNO-CCSD(T)/def2-TZVPPecp)

ZPE = 0.17921511 au (COSMO<sub>tol</sub>/B3LYP-D3/def2-TZVPPecp)

$\nu = -134.85 \text{ cm}^{-1}$

|   |           |           |           |   |           |           |           |
|---|-----------|-----------|-----------|---|-----------|-----------|-----------|
| N | -0.293675 | 0.580554  | -0.255230 | C | 4.377279  | -0.961093 | 2.148646  |
| P | 3.007464  | -0.547681 | 0.953769  | H | 4.416028  | -2.049497 | 2.204647  |
| C | 0.685730  | 1.256788  | -0.185745 | H | 5.348225  | -0.594254 | 1.819370  |
| N | 1.691965  | 1.941065  | 0.040646  | H | 4.152424  | -0.572191 | 3.141223  |
| W | 3.828350  | -1.082007 | -1.518056 | C | -0.780461 | -0.433103 | -1.169484 |
| C | 4.548957  | -1.627481 | -3.308175 | H | -0.303270 | -0.356700 | -2.145209 |
| O | 4.974302  | -1.940395 | -4.332362 | H | -0.572612 | -1.411241 | -0.736392 |
| C | 5.301526  | 0.337357  | -1.235567 | H | -1.857486 | -0.322163 | -1.271808 |
| O | 6.094514  | 1.141280  | -1.045386 | C | 1.909611  | 3.309373  | -0.419407 |
| C | 5.023374  | -2.542238 | -0.668936 | H | 0.979907  | 3.876371  | -0.405142 |
| O | 5.692198  | -3.361113 | -0.230915 | H | 2.624541  | 3.773703  | 0.257769  |
| C | 2.280451  | -2.430092 | -1.646499 | H | 2.322816  | 3.303617  | -1.428060 |
| O | 1.404307  | -3.168105 | -1.707536 | C | 3.196457  | 1.200703  | 1.095089  |
| C | 2.662631  | 0.306423  | -2.469418 | O | 3.749842  | 2.106604  | 1.565558  |
| O | 2.005587  | 1.057689  | -3.041671 |   |           |           |           |

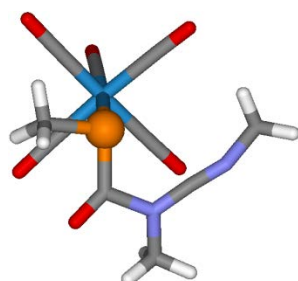

**10''**: E = -1353.49862367648 au (COSMO<sub>tol</sub>/DLPNO-CCSD(T)/def2-TZVPPecp)

ZPE = 0.18071884 au (COSMO<sub>tol</sub>/B3LYP-D3/def2-TZVPPecp)

|   |           |           |           |   |           |           |           |
|---|-----------|-----------|-----------|---|-----------|-----------|-----------|
| N | -0.129801 | 0.542512  | -0.408005 | C | 4.396207  | -0.801698 | 2.113030  |
| P | 3.006233  | -0.528592 | 0.919867  | H | 4.547843  | -1.877095 | 2.205656  |
| C | 0.845773  | 1.145326  | -0.185190 | H | 5.324099  | -0.343324 | 1.772077  |
| N | 1.831870  | 1.873650  | 0.149611  | H | 4.139424  | -0.400454 | 3.093395  |
| W | 3.813733  | -1.125178 | -1.538116 | C | -0.789608 | -0.445788 | -1.214552 |
| C | 4.545515  | -1.672856 | -3.326770 | H | -0.451549 | -0.370673 | -2.246640 |
| O | 4.976778  | -1.982191 | -4.350396 | H | -0.534796 | -1.425877 | -0.811435 |
| C | 5.310686  | 0.265878  | -1.216709 | H | -1.864233 | -0.298109 | -1.150385 |
| O | 6.110420  | 1.057366  | -1.007006 | C | 1.944945  | 3.270492  | -0.311381 |
| C | 4.950686  | -2.617309 | -0.651150 | H | 0.951791  | 3.692247  | -0.439887 |
| O | 5.576606  | -3.451635 | -0.181513 | H | 2.487719  | 3.809493  | 0.460015  |
| C | 2.235155  | -2.425758 | -1.682514 | H | 2.495293  | 3.303840  | -1.250143 |
| O | 1.328602  | -3.129449 | -1.747760 | C | 3.011761  | 1.268450  | 0.956658  |
| C | 2.684688  | 0.295818  | -2.462808 | O | 3.699337  | 2.079663  | 1.508646  |
| O | 2.025806  | 1.083426  | -2.990880 |   |           |           |           |

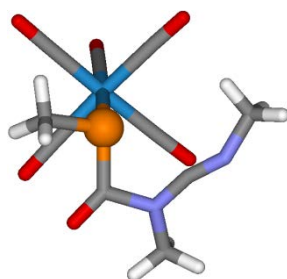

**TS(10''→2'')**: E = -1353.49663012064 au (COSMO<sub>tol</sub>/DLPNO-CCSD(T)/def2-TZVPPecp)

ZPE = 0.18016822 au (COSMO<sub>tol</sub>/B3LYP-D3/def2-TZVPPecp)

$\nu = -169.41 \text{ cm}^{-1}$

|   |           |           |           |   |           |           |           |
|---|-----------|-----------|-----------|---|-----------|-----------|-----------|
| N | -0.139565 | 0.667296  | -0.325878 | C | 4.072311  | -0.956937 | 2.124686  |
| P | 2.946759  | -0.456089 | 0.748227  | H | 4.091706  | -2.045531 | 2.169456  |
| C | 0.919724  | 1.127890  | -0.104817 | H | 5.086258  | -0.595904 | 1.950989  |
| N | 1.903391  | 1.923130  | 0.121244  | H | 3.711765  | -0.571039 | 3.078022  |
| W | 3.908495  | -1.076353 | -1.615958 | C | -0.796804 | -0.467262 | -0.913086 |
| C | 4.708162  | -1.617205 | -3.381536 | H | -0.686933 | -0.435096 | -1.996453 |
| O | 5.175496  | -1.922332 | -4.389779 | H | -0.318934 | -1.369088 | -0.523146 |
| C | 5.402596  | 0.308307  | -1.249538 | H | -1.848964 | -0.457718 | -0.643681 |
| O | 6.205774  | 1.091331  | -1.023525 | C | 1.974437  | 3.284181  | -0.439369 |
| C | 5.005784  | -2.561402 | -0.675187 | H | 0.995003  | 3.752263  | -0.383863 |
| O | 5.605785  | -3.389549 | -0.162011 | H | 2.683976  | 3.826619  | 0.180660  |
| C | 2.334887  | -2.374864 | -1.833302 | H | 2.321947  | 3.248923  | -1.470014 |
| O | 1.426814  | -3.071144 | -1.935869 | C | 3.063775  | 1.339533  | 0.879635  |
| C | 2.788610  | 0.351524  | -2.552468 | O | 3.799268  | 2.098677  | 1.447032  |
| O | 2.129461  | 1.140011  | -3.074755 |   |           |           |           |

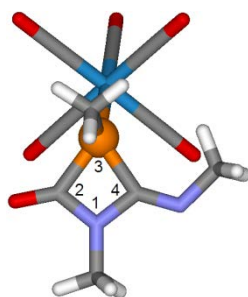

**2''**: E = -1353.56483581642 au (COSMO<sub>tol</sub>/DLPNO-CCSD(T)/def2-TZVPPecp)

ZPE = 0.18260352 au (COSMO<sub>tol</sub>/B3LYP-D3/def2-TZVPPecp)

N1-C2:  $d = 1.381 \text{ \AA}$ ; WBI = 1.116;  $\rho(r) = 31.71 \cdot 10^{-2} e/a_0^3$ .

N1-C4:  $d = 1.403 \text{ \AA}$ ; WBI = 1.051;  $\rho(r) = 30.28 \cdot 10^{-2} e/a_0^3$ .

P3-C2:  $d = 1.898 \text{ \AA}$ ; WBI = 0.800;  $\rho(r) = 15.43 \cdot 10^{-2} e/a_0^3$ .

P3-C4:  $d = 1.878 \text{ \AA}$ ; WBI = 0.814;  $\rho(r) = 15.50 \cdot 10^{-2} e/a_0^3$ .

|   |           |           |          |   |           |           |          |
|---|-----------|-----------|----------|---|-----------|-----------|----------|
| N | -0.322186 | 0.294457  | 0.202430 | O | 0.691852  | -5.804857 | 4.818846 |
| P | 0.130391  | -0.081196 | 4.070233 | C | 1.583551  | -2.327292 | 6.102363 |
| C | 0.749004  | -0.046452 | 0.655408 | O | 2.176145  | -2.109484 | 7.058576 |
| N | 1.782536  | -0.300470 | 1.251569 | C | -1.251910 | -2.677031 | 5.389043 |
| W | 0.538958  | -2.685212 | 4.362895 | O | -2.247096 | -2.691743 | 5.956132 |
| C | 0.639176  | -4.667659 | 4.646459 | C | -0.481980 | -2.947418 | 2.591248 |

|   |           |           |           |   |           |           |           |
|---|-----------|-----------|-----------|---|-----------|-----------|-----------|
| O | -1.051153 | -3.095289 | 1.608748  | H | -2.216709 | -0.544293 | 0.001757  |
| C | 2.332006  | -2.741874 | 3.339087  | H | -1.466718 | -0.022423 | -1.507124 |
| O | 3.335913  | -2.800959 | 2.792685  | C | 3.135484  | -0.203027 | 0.719115  |
| C | -0.204318 | 0.700119  | 5.740735  | H | 3.170026  | 0.329966  | -0.232766 |
| H | -1.226647 | 0.404519  | 5.979867  | H | 3.760127  | 0.319756  | 1.443532  |
| H | 0.455797  | 0.334963  | 6.523509  | H | 3.545506  | -1.204321 | 0.588059  |
| H | -0.159874 | 1.785642  | 5.676503  | C | 1.797328  | 0.327308  | 4.010112  |
| C | -1.276906 | -0.507226 | -0.549447 | O | 2.900322  | 0.624470  | 3.956087  |
| H | -0.925290 | -1.525127 | -0.720485 |   |           |           |           |

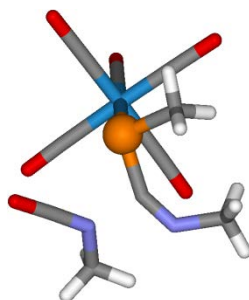

**TS(2''→4''·11):** E = -1353.47456026139 au (COSMO<sub>tol</sub>/DLPNO-CCSD(T)/def2-TZVPPecp)

ZPE = 0.17925252 au (COSMO<sub>tol</sub>/B3LYP-D3/def2-TZVPPecp)

$\nu = -294.25 \text{ cm}^{-1}$

|   |          |           |           |   |           |           |           |
|---|----------|-----------|-----------|---|-----------|-----------|-----------|
| N | 0.423300 | 0.261903  | 0.531162  | C | 2.985996  | -1.468984 | 1.844792  |
| P | 3.296410 | -0.103054 | 0.623157  | H | 2.338918  | -2.259549 | 1.469532  |
| C | 1.613172 | 0.457796  | 0.391069  | H | 3.960546  | -1.909077 | 2.062315  |
| N | 1.825968 | 2.042061  | -0.379624 | H | 2.580273  | -1.069455 | 2.774371  |
| W | 3.870118 | -1.058921 | -1.784011 | C | -0.264025 | -0.957078 | 0.913930  |
| C | 4.395703 | -1.814311 | -3.570672 | H | -1.329122 | -0.839973 | 0.730002  |
| O | 4.690036 | -2.253945 | -4.595073 | H | 0.108732  | -1.803530 | 0.335691  |
| C | 5.852236 | -0.911128 | -1.207632 | H | -0.109903 | -1.158661 | 1.975170  |
| O | 6.946767 | -0.822015 | -0.883970 | C | 0.804364  | 2.447822  | -1.356780 |
| C | 3.760307 | -2.961416 | -0.988353 | H | -0.102138 | 1.919063  | -1.066715 |
| O | 3.683870 | -4.012922 | -0.539907 | H | 0.642307  | 3.521723  | -1.315630 |
| C | 1.879511 | -1.146371 | -2.265079 | H | 1.117426  | 2.144432  | -2.353551 |
| O | 0.756943 | -1.167079 | -2.511275 | C | 2.793851  | 2.731070  | -0.037553 |
| C | 3.930226 | 0.853857  | -2.514033 | O | 3.668713  | 3.405810  | 0.285473  |
| O | 3.931920 | 1.935977  | -2.906401 |   |           |           |           |

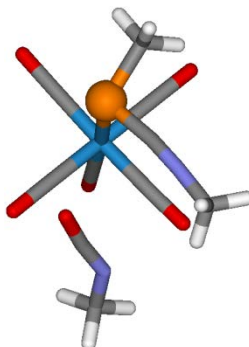

**4''·11:** E = -1353.51617448694 au (COSMO<sub>tol</sub>/DLPNO-CCSD(T)/def2-TZVPPecp)

ZPE = 0.17865724 au (COSMO<sub>tol</sub>/B3LYP-D3/def2-TZVPPecp)

|   |          |           |          |   |          |           |          |
|---|----------|-----------|----------|---|----------|-----------|----------|
| N | 0.732711 | -0.434861 | 1.149575 | P | 3.626161 | -0.575644 | 1.115887 |
|---|----------|-----------|----------|---|----------|-----------|----------|

|   |          |           |           |   |           |           |           |
|---|----------|-----------|-----------|---|-----------|-----------|-----------|
| C | 1.883823 | -0.570210 | 1.162879  | H | 3.409273  | -3.013519 | 1.649738  |
| N | 0.749572 | 2.147666  | -1.194631 | H | 4.988396  | -2.322491 | 2.046728  |
| W | 3.994751 | -0.960546 | -1.480885 | H | 3.615236  | -2.023370 | 3.121071  |
| C | 4.408711 | -1.216857 | -3.428800 | C | -0.661295 | -0.189391 | 1.107087  |
| O | 4.642325 | -1.366921 | -4.547909 | H | -0.884045 | 0.356603  | 0.190583  |
| C | 6.013438 | -0.992689 | -1.025209 | H | -1.195127 | -1.139032 | 1.103343  |
| O | 7.130255 | -1.021448 | -0.774792 | H | -0.958528 | 0.402009  | 1.972995  |
| C | 3.901333 | -2.999188 | -1.187430 | C | 0.732282  | 2.361802  | -2.620675 |
| O | 3.838624 | -4.130654 | -1.016253 | H | 0.324836  | 1.476275  | -3.102594 |
| C | 1.981514 | -0.978416 | -1.870971 | H | 0.098269  | 3.215620  | -2.861597 |
| O | 0.849851 | -1.014250 | -2.067527 | H | 1.738395  | 2.542815  | -2.996573 |
| C | 4.060004 | 1.084528  | -1.697980 | C | 1.290610  | 2.517758  | -0.197971 |
| O | 4.086121 | 2.224879  | -1.824448 | O | 1.743069  | 2.773943  | 0.856093  |
| C | 3.911863 | -2.150365 | 2.080669  | O | 2.900322  | 0.624470  | 3.956087  |

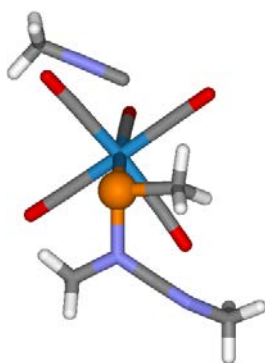

6<sup>+</sup>.CNMe: E = -1372.83430861822 au (COSMO<sub>tol</sub>/DLPNO-CCSD(T)/def2-TZVPPecp)  
 ZPE = 0.21782485 au (COSMO<sub>tol</sub>/B3LYP-D3/def2-TZVPPecp)  
 BSSE = 0.00105564 au (DLPNO-CCSD(T)/def2-TZVPPecp)

|   |           |           |           |   |           |           |           |
|---|-----------|-----------|-----------|---|-----------|-----------|-----------|
| N | -0.256272 | -0.047915 | 0.062075  | H | 2.877592  | 1.749253  | -0.891311 |
| P | 1.620190  | -0.134671 | -0.181239 | H | 1.257165  | 1.862578  | -1.579337 |
| C | -0.882843 | 1.038429  | 0.064263  | C | -0.965069 | -1.318045 | 0.319144  |
| N | -1.438656 | 2.074605  | -0.108505 | H | -0.371508 | -2.112302 | -0.127316 |
| W | 2.570633  | -0.404726 | 2.240572  | H | -1.053709 | -1.484529 | 1.389959  |
| C | 3.340463  | -0.510960 | 4.106135  | H | -1.951353 | -1.292238 | -0.139469 |
| O | 3.766692  | -0.546016 | 5.176487  | C | -1.858709 | 3.178874  | 0.734265  |
| C | 3.817725  | 1.195804  | 1.837295  | H | -1.530368 | 3.040874  | 1.762427  |
| O | 4.499162  | 2.092229  | 1.631061  | H | -1.438077 | 4.094425  | 0.321935  |
| C | 1.050748  | 0.858991  | 2.751039  | H | -2.944319 | 3.250191  | 0.686618  |
| O | 0.144555  | 1.545955  | 2.943292  | C | 4.816436  | -0.035926 | -1.508182 |
| C | 1.375532  | -2.019316 | 2.657324  | N | 5.205759  | -1.110280 | -1.717406 |
| O | 0.724024  | -2.931940 | 2.915514  | C | 5.657533  | -2.436747 | -1.947433 |
| C | 3.960254  | -1.735007 | 1.497135  | H | 6.123897  | -2.497883 | -2.929902 |
| O | 4.705342  | -2.504807 | 1.085503  | H | 6.379518  | -2.711498 | -1.180520 |
| C | 1.816066  | 1.639076  | -0.669066 | H | 4.810313  | -3.119573 | -1.901777 |
| H | 1.552615  | 2.355546  | 0.111309  |   |           |           |           |

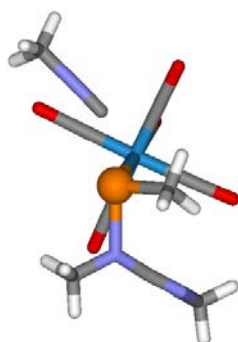

**TS(6''·CNMe → 4''·9):**

E = -1372.82971742416 au (COSMO<sub>tol</sub>/DLPNO-CCSD(T)/def2-TZVPPecp)

ZPE = 0.21750337 au (COSMO<sub>tol</sub>/B3LYP-D3/def2-TZVPPecp)

$\nu = -215.77 \text{ cm}^{-1}$

|   |           |           |           |   |           |           |           |
|---|-----------|-----------|-----------|---|-----------|-----------|-----------|
| N | -0.279057 | -0.086919 | -0.289508 | H | 2.793615  | 1.954039  | -1.273235 |
| P | 1.772771  | -0.126056 | -0.513374 | H | 1.351849  | 1.588515  | -2.240221 |
| C | -0.865640 | 0.803299  | 0.346552  | C | -0.964191 | -1.270700 | -0.817994 |
| N | -1.364026 | 1.758567  | 0.858203  | H | -0.580022 | -2.152975 | -0.306973 |
| W | 2.573605  | 0.040987  | 2.010817  | H | -2.040178 | -1.197774 | -0.666388 |
| C | 3.160098  | 0.100716  | 3.936550  | H | -0.738320 | -1.354098 | -1.879626 |
| O | 3.489034  | 0.141680  | 5.042007  | C | -1.723910 | 2.117020  | 2.217725  |
| C | 4.348748  | 0.903682  | 1.404956  | H | -1.445455 | 1.339618  | 2.927625  |
| O | 5.333081  | 1.392592  | 1.078425  | H | -1.218299 | 3.046560  | 2.469842  |
| C | 1.803106  | 1.937740  | 2.132468  | H | -2.799044 | 2.286333  | 2.253854  |
| O | 1.403100  | 3.014764  | 2.178840  | C | 4.014458  | -0.529487 | -1.258136 |
| C | 0.780513  | -0.790351 | 2.545722  | N | 4.811878  | -1.367556 | -1.355564 |
| O | -0.244617 | -1.232424 | 2.830376  | C | 5.757883  | -2.424789 | -1.398937 |
| C | 3.404612  | -1.820146 | 1.722259  | H | 5.908510  | -2.738814 | -2.430936 |
| O | 3.885333  | -2.844505 | 1.522847  | H | 6.703694  | -2.083838 | -0.979532 |
| C | 1.769165  | 1.593432  | -1.231998 | H | 5.381252  | -3.261346 | -0.811034 |
| H | 1.197789  | 2.284688  | -0.613720 |   |           |           |           |

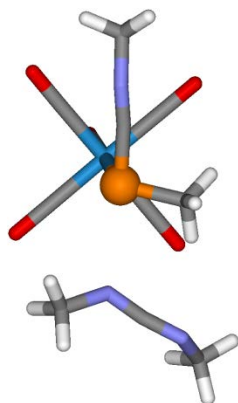

**4''·9:**

E = -1372.85618942236 au (COSMO<sub>tol</sub>/DLPNO-CCSD(T)/def2-TZVPPecp)

ZPE = 0.21804488 au (COSMO<sub>tol</sub>/B3LYP-D3/def2-TZVPPecp)

P-C (in 4''): d = 1.742 Å; WBI = 1.237;  $\rho(r) = 15.11 \cdot 10^{-2} e/a_0^3$ .

N-C (in 4''): d = 1.162 Å; WBI = 2.282;  $\rho(r) = 45.86 \cdot 10^{-2} e/a_0^3$ .

P-CH<sub>3</sub> (in 4''): d = 1.869 Å; WBI = 0.929;  $\rho(r) = 15.24 \cdot 10^{-2} e/a_0^3$ .

|   |          |           |          |   |          |           |           |
|---|----------|-----------|----------|---|----------|-----------|-----------|
| N | 0.322975 | -0.038268 | 0.058024 | P | 3.387193 | -0.012952 | -0.120882 |
|---|----------|-----------|----------|---|----------|-----------|-----------|

|   |           |           |           |   |           |           |           |
|---|-----------|-----------|-----------|---|-----------|-----------|-----------|
| C | -0.305051 | 1.003400  | 0.062691  | H | 3.326170  | 1.850247  | -1.740802 |
| N | -0.776353 | 2.122380  | 0.007294  | C | -0.112685 | -1.346615 | -0.403480 |
| W | 3.620342  | -0.098426 | 2.538012  | H | 0.704341  | -1.805462 | -0.959668 |
| C | 3.651587  | -0.120266 | 4.542564  | H | -0.329734 | -1.981686 | 0.455581  |
| O | 3.667682  | -0.123047 | 5.695691  | H | -0.996566 | -1.288763 | -1.041698 |
| C | 5.070856  | 1.352996  | 2.464744  | C | -1.544035 | 2.801706  | 1.042328  |
| O | 5.892407  | 2.153112  | 2.392910  | H | -1.696391 | 2.180007  | 1.926203  |
| C | 2.151795  | 1.353079  | 2.583872  | H | -1.014553 | 3.708388  | 1.335442  |
| O | 1.338932  | 2.158727  | 2.620726  | H | -2.512685 | 3.092240  | 0.634606  |
| C | 2.159247  | -1.560044 | 2.504528  | C | 5.107933  | -0.113011 | -0.313671 |
| O | 1.351762  | -2.371509 | 2.494179  | N | 6.249863  | -0.320781 | -0.476831 |
| C | 5.073143  | -1.550955 | 2.459015  | C | 7.592062  | -0.354454 | 0.016586  |
| O | 5.896658  | -2.349702 | 2.402650  | H | 7.934636  | -1.388230 | 0.025635  |
| C | 3.184081  | 1.763564  | -0.664240 | H | 8.230684  | 0.222446  | -0.650142 |
| H | 2.157366  | 2.037413  | -0.427344 | H | 7.632361  | 0.059182  | 1.024372  |
| H | 3.857061  | 2.440246  | -0.141999 |   |           |           |           |

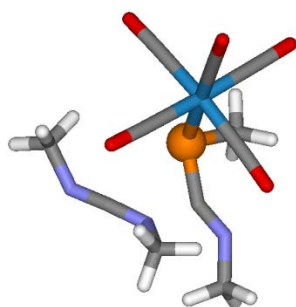

**TS(4<sup>..</sup>.9 → 12<sup>..</sup>):** E = -1372.83672239526 au (COSMO<sub>tol</sub>/DLPNO-CCSD(T)/def2-TZVPPecp)

ZPE = 0.21898044 au (COSMO<sub>tol</sub>/B3LYP-D3/def2-TZVPPecp)

$\nu = -320.57 \text{ cm}^{-1}$

|   |           |           |           |   |           |           |           |
|---|-----------|-----------|-----------|---|-----------|-----------|-----------|
| N | 0.931008  | 0.208570  | -0.209052 | H | -0.111374 | 0.087838  | 5.661404  |
| P | 0.094250  | -0.323818 | 3.218260  | H | -1.023248 | 1.281491  | 4.710381  |
| C | 1.660003  | 0.296531  | 0.725682  | C | 0.002831  | -0.798509 | -0.686100 |
| N | 2.384116  | 0.527788  | 1.712850  | H | 0.545289  | -1.703429 | -0.957304 |
| W | 1.042367  | -2.780482 | 3.496641  | H | -0.705160 | -1.024364 | 0.113430  |
| C | 1.698767  | -4.659676 | 3.774493  | H | -0.526197 | -0.412465 | -1.552332 |
| O | 2.085618  | -5.732954 | 3.944421  | C | 3.825626  | 0.253717  | 1.763495  |
| C | 2.653947  | -1.931098 | 4.448255  | H | 4.060524  | -0.677353 | 1.252545  |
| O | 3.536547  | -1.397074 | 4.952957  | H | 4.376818  | 1.075199  | 1.306092  |
| C | 0.017046  | -2.909937 | 5.291899  | H | 4.113157  | 0.168710  | 2.807725  |
| O | -0.547758 | -3.001920 | 6.283237  | C | 1.487296  | 0.794696  | 3.312195  |
| C | -0.638548 | -3.393096 | 2.476818  | N | 1.966117  | 1.661923  | 4.007623  |
| O | -1.571222 | -3.695279 | 1.880831  | C | 2.947950  | 2.692030  | 3.824294  |
| C | 2.025507  | -2.724933 | 1.710767  | H | 3.834975  | 2.461576  | 4.416683  |
| O | 2.567518  | -2.712835 | 0.692383  | H | 3.227620  | 2.796135  | 2.773020  |
| C | -0.739188 | 0.231490  | 4.782607  | H | 2.544310  | 3.639379  | 4.182030  |
| H | -1.643114 | -0.368226 | 4.896237  |   |           |           |           |

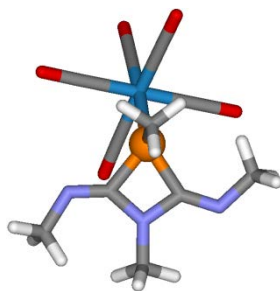

**12<sup>o</sup>:** E = -1372.91302604377 au (COSMO<sub>tol</sub>/DLPNO-CCSD(T)/def2-TZVPPecp)

ZPE = 0.22216631 au (COSMO<sub>tol</sub>/B3LYP-D3/def2-TZVPPecp)

|   |           |           |          |   |           |           |           |
|---|-----------|-----------|----------|---|-----------|-----------|-----------|
| N | 0.382352  | 0.520994  | 0.407973 | H | -0.430940 | 0.551090  | 5.151000  |
| P | 0.697186  | -0.322401 | 3.221134 | H | -0.563824 | 1.691117  | 3.787612  |
| C | 0.929389  | 0.462259  | 1.534159 | C | -0.873606 | -0.172191 | 0.194639  |
| N | 2.136699  | 1.053659  | 1.919576 | H | -0.752437 | -0.911544 | -0.598848 |
| W | 0.969508  | -2.776778 | 3.614257 | H | -1.246277 | -0.684789 | 1.090028  |
| C | 1.270064  | -4.752949 | 3.990937 | H | -1.629801 | 0.543060  | -0.135181 |
| O | 1.442504  | -5.866132 | 4.208749 | C | 3.034482  | 1.773990  | 1.032050  |
| C | 1.696138  | -2.317908 | 5.499179 | H | 2.754144  | 1.524318  | 0.010500  |
| O | 2.093998  | -2.081903 | 6.544226 | H | 2.946098  | 2.852844  | 1.168208  |
| C | -0.946097 | -2.877202 | 4.369988 | H | 4.062688  | 1.466796  | 1.210813  |
| O | -2.013378 | -2.912198 | 4.783818 | C | 2.232311  | 0.717508  | 3.282389  |
| C | 0.257967  | -3.244471 | 1.734952 | N | 3.024139  | 0.950121  | 4.225936  |
| O | -0.132151 | -3.515658 | 0.693618 | C | 4.211854  | 1.781035  | 4.088942  |
| C | 2.867455  | -2.567885 | 2.826163 | H | 5.068393  | 1.158398  | 3.815936  |
| O | 3.909490  | -2.419243 | 2.377134 | H | 4.114850  | 2.580914  | 3.350871  |
| C | -0.596358 | 0.641812  | 4.076914 | H | 4.433623  | 2.230846  | 5.056388  |
| H | -1.573908 | 0.221822  | 3.840527 |   |           |           |           |

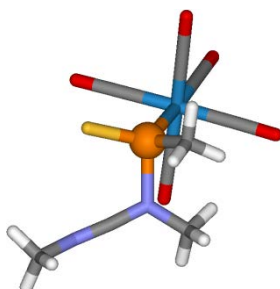

**13<sup>o</sup>:** E = -1638.12283036197 au (COSMO<sub>tol</sub>/DLPNO-CCSD(T)/def2-TZVPPecp)

ZPE = 0.17367835 au (COSMO<sub>tol</sub>/B3LYP-D3/def2-TZVPPecp)

|   |           |           |           |   |           |           |           |
|---|-----------|-----------|-----------|---|-----------|-----------|-----------|
| N | -0.025136 | 0.013049  | -0.156062 | O | 5.550367  | 0.505364  | -1.586054 |
| P | 1.847255  | 0.522981  | -0.298495 | C | 2.417849  | -0.800674 | 0.832272  |
| C | -0.823559 | 0.913968  | 0.208741  | H | 2.201653  | -1.792658 | 0.434800  |
| N | -1.536329 | 1.827114  | 0.422105  | H | 3.500260  | -0.689803 | 0.911135  |
| W | 2.551925  | 0.249359  | -2.713255 | H | 1.975326  | -0.674021 | 1.819552  |
| C | 3.231028  | 0.078547  | -4.622570 | C | -0.489092 | -1.348035 | -0.484661 |
| O | 3.616776  | -0.026549 | -5.699390 | H | 0.158242  | -1.739867 | -1.264193 |
| C | 2.633377  | -1.785500 | -2.489957 | H | -0.424537 | -1.984423 | 0.396054  |
| O | 2.663808  | -2.926031 | -2.354523 | H | -1.511211 | -1.320286 | -0.854989 |
| C | 0.598131  | 0.116470  | -3.337314 | C | -2.101215 | 2.569730  | 1.522941  |
| O | -0.504460 | 0.041158  | -3.646379 | H | -1.982022 | 2.032597  | 2.462627  |
| C | 2.439559  | 2.316090  | -2.894996 | H | -1.581559 | 3.525577  | 1.573737  |
| O | 2.371378  | 3.449418  | -3.006721 | H | -3.153333 | 2.753150  | 1.317253  |
| C | 4.486954  | 0.415774  | -1.997561 | S | 1.915408  | 2.252198  | 0.640720  |





|   |           |           |           |   |           |          |          |
|---|-----------|-----------|-----------|---|-----------|----------|----------|
| H | -1.643637 | -0.873058 | -1.020480 | H | -1.093113 | 3.222360 | 1.700539 |
| C | -1.943463 | 2.538217  | 1.586267  | H | -2.716040 | 3.042678 | 1.001865 |
| H | -2.358777 | 2.337608  | 2.575980  | S | 1.087444  | 2.134273 | 0.546363 |

## References

- <sup>1</sup> J. M. Villalba Franco, T. Sasamori, G. Schnakenburg, A. Espinosa Ferao, R. Streubel, *Chem. Eur. J.*, 2015, **21**, 9650.
- <sup>2</sup> ORCA - An *ab initio*, DFT and semiempirical SCF-MO package. Written by F. Neese, Max Planck Institute for Bioinorganic Chemistry, D-45470 Mülheim/Ruhr, 2012. Version 3.0.2. Web page: <http://www.cec.mpg.de/forum/portal.php>. F. Neese, "The ORCA program system", *WIREs Comput Mol Sci*, 2012, **2**, 73.
- <sup>3</sup> a) A. D. Becke, *J. Chem. Phys.*, 1993, **98**, 5648. b) C. T. Lee, W. T. Yang, R. G. Parr, *Phys. Rev. B*, 1988, **37**, 785.
- <sup>4</sup> F. Weigend, R. Ahlrichs, *Phys. Chem. Chem. Phys.*, 2005, **7**, 3297.
- <sup>5</sup> D. Andrae, U. Haeussermann, M. Dolg, H. Stoll, H. Preuss, *Theor. Chim. Acta*, 1990, **77**, 123. ECP basis sets for W [SD(60,MWB)] have been obtained from Turbomole basis set library at <ftp://ftp.chemie.uni-karlsruhe.de/pub/basen/>.
- <sup>6</sup> S. Grimme, J. Antony, S. Ehrlich, H. Krieg, *J. Chem. Phys.*, 2010, **132**, 154104.
- <sup>7</sup> a) A. Klamt, G. Schuurmann, *J. Chem. Soc. Perkin Trans. 2*, 1993, **220**, 799; b) A. Klamt, *J. Phys. Chem.* 1995, **99**, 2224.
- <sup>8</sup> A. Bergner, M. Dolg, W. Kuchle, H. Stoll, H. Preuss, *Mol. Phys.* 1993, **80**, 1431. Obtained from the EMSL Basis Set Library at <https://bse.pnl.gov/bse/portal>. D. Feller, *J. Comp. Chem.*, 1996, **17**, 1571.
- <sup>9</sup> C. Riplinger, B. Sandhoefer, A. Hansen, F. Neese, *J. Chem. Phys.*, 2013, **139**, 134101.
- <sup>10</sup> a) H. P. Kelly, *Phys. Rev.*, 1964, **134**, A1450-A1453; b) W. Meyer, *J. Chem. Phys.*, 1973, **58**, 1017; c) R. Ahlrichs, H. Lischka, V. Staemmler, W. Kutzelnigg, *J. Chem. Phys.*, 1975, **62**, 1225; d) C. Kollmar, F. Neese, *Mol. Phys.*, 2010, **108**, 2449.
- <sup>11</sup> F. Wennmohs, F. Neese, *Chem. Phys.*, 2008, **343**, 217.
- <sup>12</sup> a) F. Neese, F. Wennmohs, A. Hansen, *J. Chem. Phys.*, 2009, **130**, 114108; b) F. Neese, A. Hansen, F. Wennmohs, S. Grimme, *Acc. Chem. Res.*, 2009, **42**, 641.
- <sup>13</sup> a) S. Grimme, *J. Chem. Phys.*, 2003, **118**, 9095–9102; b) S. Grimme, L. Goerigk, F. F. Reinhold, *WIREs Comput. Mol. Sci.*, 2012, **2**, 886.
- <sup>14</sup> a) L. Goerigk and S. Grimme *J. Chem. Theory Comput.*, 2011, **7**, 291; b) *ibid. Phys. Chem. Chem. Phys.*, 2011, **13**, 6670.
- <sup>15</sup> Using the NBO 5.9 code interfaced to Gaussian09. Glendening, E. D.; Badenhoop, J. K.; Reed, A. E.; Carpenter, J. E.; Bohmann, J. A.; Morales, C. M.; Weinhold, F. Theoretical Chemistry Institute, University of Wisconsin, Madison (2001).
- <sup>16</sup> (a) AIM2000 v. 2.0, designed by F. Biegler-König, J. Schönbohm, J. 2002. Home page <http://www.aim2000.de/>. F. Biegler-König, J. Schönbohm, D. Bayles, *J. Comp. Chem.* 2001, **22**, 545. (b) F. Biegler-König, J. Schönbohm, J. *J. Comp. Chem.* 2002, **23**, 1489.
